1           **The SARS-CoV-2 host cell membrane fusion protein**  
2           **TMPRSS2 is a tumor suppressor and its downregulation**  
3           **correlates with increased antitumor immunity and**  
4           **immunotherapy response in lung adenocarcinoma**

5  
6           Zhixian Liu <sup>1</sup>, Zhilan Zhang <sup>2, 3, 4</sup>, Qiushi Feng <sup>2, 3, 4</sup>, Xiaosheng Wang <sup>2, 3, 4\*</sup>

7  
8           <sup>1</sup> Jiangsu Cancer Hospital, Jiangsu Institute of Cancer Research, The Affiliated Cancer  
9           Hospital of Nanjing Medical University, Nanjing 210009, China

10          <sup>2</sup> Biomedical Informatics Research Lab, School of Basic Medicine and Clinical  
11          Pharmacy, China Pharmaceutical University, Nanjing 211198, China

12          <sup>3</sup> Cancer Genomics Research Center, School of Basic Medicine and Clinical  
13          Pharmacy, China Pharmaceutical University, Nanjing 211198, China

14          <sup>4</sup> Big Data Research Institute, China Pharmaceutical University, Nanjing 211198,  
15          China

16  
17  
18          \* Correspondence to: Xiaosheng Wang, E-mail: [xiaosheng.wang@cpu.edu.cn](mailto:xiaosheng.wang@cpu.edu.cn)

19

20

## 21 **Abstract**

### 22 **Background**

23 *TMPRSS2* is a host cell membrane fusion protein for SARS-CoV-2 invading human  
24 host cells. It also has an association with cancer, particularly prostate cancer.  
25 However, its association with lung cancer remains insufficiently explored. Thus, an  
26 in-depth investigation into the association between *TMPRSS2* and lung cancer is  
27 significant, considering that lung cancer is the leading cause of cancer death and that  
28 the lungs are the primary organ SARS-CoV-2 attacks.

### 29 **Methods**

30 Using five lung adenocarcinoma (LUAD) genomics datasets, we explored  
31 associations between *TMPRSS2* expression and immune signatures, cancer-associated  
32 pathways, tumor progression phenotypes, and clinical prognosis in LUAD by the  
33 bioinformatics approach. Furthermore, we validated the findings from the  
34 bioinformatics analysis by performing in vitro experiments with the human LUAD  
35 cell line A549 and in vivo experiments with mouse tumor models. We also validated  
36 our findings in LUAD patients from Jiangsu Cancer Hospital, China.

### 37 **Results**

38 *TMPRSS2* expression levels were negatively correlated with the enrichment levels of  
39 CD8<sup>+</sup> T and NK cells and immune cytolytic activity in LUAD, which represent  
40 antitumor immune signatures. Meanwhile, *TMPRSS2* expression levels were  
41 negatively correlated with the enrichment levels of CD4<sup>+</sup> regulatory T cells and  
42 myeloid-derived suppressor cells and *PD-L1* expression levels in LUAD, which  
43 represent antitumor immunosuppressive signatures. However, *TMPRSS2* expression  
44 levels showed a significant positive correlation with the ratios of immune-  
45 stimulatory/immune-inhibitory signatures (CD8<sup>+</sup> T cells/PD-L1) in LUAD. It  
46 indicated that *TMPRSS2* levels had a stronger negative correlation with immune-  
47 inhibitory signatures than with immune-stimulatory signatures. *TMPRSS2*  
48 downregulation correlated with elevated activities of many oncogenic pathways in  
49 LUAD, including cell cycle, mismatch repair, p53, and extracellular matrix (ECM)  
50 signaling. *TMPRSS2* downregulation correlated with increased proliferation, stemness,  
51 genomic instability, tumor advancement, and worse survival in LUAD. In vitro and in  
52 vivo experiments validated the association of *TMPRSS2* deficiency with increased  
53 tumor cell proliferation and invasion and antitumor immunity in LUAD. Moreover, in  
54 vivo experiments demonstrated that *TMPRSS2*-knockdown tumors were more  
55 sensitive to BMS-1, an inhibitor of PD-1/PD-L1.

### 56 **Conclusions**

57 *TMPRSS2* is a tumor suppressor, while its downregulation is a positive biomarker of  
58 immunotherapy in LUAD. Our data provide a connection between lung cancer and  
59 pneumonia caused by SARS-CoV-2 infection.

60

## 61 **BACKGROUND**

62 The severe acute respiratory syndrome coronavirus 2 (SARS-CoV-2) has infected  
63 more than 177 million people and caused more than 3.8 million deaths worldwide as  
64 of June 5, 2021 (<https://coronavirus.jhu.edu/map.html>). SARS-CoV-2 invades host  
65 cells using its spike glycoprotein (S) [1], which is composed of S1 and S2 functional  
66 domains. S1 binds the angiotensin-converting enzyme 2 (ACE2) for cell attachment,  
67 and S2 binds the transmembrane protease serine 2 (TMPRSS2) for membrane fusion  
68 [1]. Since TMPRSS2 plays a crucial role in the regulation of SARS-CoV-2 invasion,  
69 and cancer patients are susceptible to SARS-CoV-2 infection, an investigation into the  
70 role of TMPRSS2 in cancer is significant in the context of the current SARS-CoV-2  
71 pandemic. Previous studies have demonstrated the association between TMPRSS2  
72 and cancer [2-5]. Typically, the TMPRSS2-ERG gene fusion frequently occurs in  
73 prostate cancer and is associated with tumor progression [6-8]. In a recent study [3],  
74 Katopodis et al. revealed that *TMPRSS2* was overexpressed in various cancers versus  
75 their normal tissues. In another study [4], Kong et al. explored *TMPRSS2* expression  
76 in lung adenocarcinoma (LUAD) and lung squamous cell carcinoma (LUSC). This  
77 study suggested that TMPRSS2 was a tumor suppresser in LUAD for its significant  
78 downregulation in LUAD versus normal tissue. A few studies have examined the  
79 association between TMPRSS2 and tumor immunity in cancer. For example, Bao et al.  
80 [5] investigated *TMPRSS2* expression and its associations with immune and  
81 microbiome variates across 33 tumor types. Luo et al. [9] explored the association  
82 between *TMPRSS2* expression and immune infiltration in prostate cancer. Despite  
83 these prior studies, the associations of TMPRSS2 with tumor immunity, oncogenic  
84 signatures or pathways, tumor progression and clinical outcomes in lung cancer  
85 remain insufficiently explored.

86 In this study, we analyzed the associations between *TMPRSS2* expression levels  
87 and the enrichment levels of immune signatures in five LUAD cohorts. The immune  
88 signatures included CD8+ T cells, NK cells, immune cytolytic activity, CD4+  
89 regulatory T cells, myeloid-derived suppressor cells (MDSCs), and PD-L1. We also  
90 analyzed the associations between *TMPRSS2* expression levels and the activities of  
91 several oncogenic pathways, including cell cycle, mismatch repair, and p53 signaling.  
92 Moreover, we explored the associations between *TMPRSS2* expression and tumor  
93 phenotypes (such as proliferation and tumor stemness), genomic features (such as  
94 genomic instability and intratumor heterogeneity (ITH)), tumor advancement and  
95 prognosis in these LUAD cohorts. Furthermore, we explored the association between  
96 *TMPRSS2* expression and the response to cancer immunotherapy. We validated the  
97 computational findings by performing in vitro experiments in the human lung cancer  
98 cell line A549 and in vivo experiments with mouse tumor models. We also validated  
99 our findings in LUAD patients from Jiangsu Cancer Hospital, China. Our study  
100 demonstrates that *TMPRSS2* is a tumor suppressor while its downregulation can  
101 promote antitumor immune response and cancer immunotherapy response. This study  
102 may provide insights into the connection between lung cancer and pneumonia caused  
103 by SARS-CoV-2 infection.

104

## 105 **METHODS**

### 106 **Datasets**

107 We downloaded RNA-Seq gene expression profiling (level 3 and RSEM normalized),  
108 protein expression profiling, and clinical data for the TCGA-LUAD cohort from the  
109 Genomic Data Commons Data Portal (<https://portal.gdc.cancer.gov/>). We downloaded  
110 microarray gene expression profiling (normalized) and clinical data for other four

111 LUAD cohorts (GSE12667 [10], GSE30219 [11], GSE31210 [12], and GSE50081  
112 [13]) from the Gene Expression Omnibus (<https://www.ncbi.nlm.nih.gov/geo/>). In  
113 addition, we collected 100 blood samples from LUAD patients and 20 blood samples  
114 from healthy persons from Jiangsu Cancer Hospital, China. According to the  
115 diagnosis and treatment guidelines for non-small cell lung cancer (CSCO 2020),  
116 LUAD patients in this study were divided into two groups: 50 patients in early stage  
117 (stage I) and 50 patients in late stage (stage III-IV). We log<sub>2</sub>-transformed the RNA-  
118 Seq gene expression values before further analyses. A description of these datasets is  
119 shown in Supplementary Table S1.

120

### 121 **Gene-set enrichment analysis**

122 We quantified the enrichment levels of immune signatures, pathways, and tumor  
123 phenotypes in tumors by the single-sample gene-set enrichment analysis (ssGSEA)  
124 [14] of their marker gene sets. The ssGSEA was performed with the R package  
125 “GSVA” [14]. The marker gene sets are presented in Supplementary Table S2. We  
126 used GSEA [15] to identify KEGG [16] pathways significantly associated with a gene  
127 set with a threshold of adjusted  $p$  value  $< 0.05$ . We used WGCNA [17], an R package,  
128 to identify gene modules and their associated gene ontology (GO) terms enriched in  
129 the high- (upper third) and low-*TMPRSS2*-expression-level (bottom third) LUADs.

130

### 131 **Survival Analysis**

132 We compared overall survival (OS) and disease-free survival (DFS) between the  
133 high- (upper third) and low-*TMPRSS2*-expression-level (bottom third) LUAD patients.  
134 Kaplan-Meier curves were utilized to display survival time differences, whose  
135 significances were evaluated by the log-rank test. We performed the survival analyses  
136 using the R package “survival”.

137

## 138 **Statistical analysis**

139 We used the Spearman correlation to evaluate associations between *TMPRSS2*  
140 expression levels and ssGSEA scores of gene sets; the Spearman correlation  
141 coefficients ( $\rho$ ) and  $p$  values were reported. In addition, we used the Pearson  
142 correlation to evaluate associations between *TMPRSS2* expression levels and gene or  
143 protein expression levels and the ratios of immune signatures; the Pearson correlation  
144 coefficients ( $r$ ) were reported. The ratios between immune signatures were the log2-  
145 transformed values of the ratios between the geometric mean expression levels of all  
146 marker genes in immune signatures. In comparisons of *TMPRSS2* expression levels  
147 between two classes of samples, we used the two-tailed Student's  $t$  test. We  
148 performed the statistical analyses using the R programming software ([https://cran.r-](https://cran.r-project.org/)  
149 [project.org/](https://cran.r-project.org/)).

150

## 151 **In vitro experiments**

### 152 **Antibodies, reagents and cell lines**

153 All antibodies were used at a dilution of 1:1000 unless otherwise specified. Anti-PD-  
154 L1 (ab213480), anti-CD8 (ab22378), anti-CD49b (ab181548), anti-MSH6 (ab92471),  
155 anti-*TMPRSS2* (ab109131) and anti-GAPDH (ab181603) were purchased from  
156 Abcam (Burlingame, CA). PE anti-mouse TNF- $\alpha$  antibody (12-7321-81), APC anti-  
157 mouse IFN- $\gamma$  antibody (17-7311-81), APC anti-mouse CD279 (PD-1) antibody (12-  
158 9985-81), and APC anti-mouse CD223 (LAG-3) antibody (12-2231-81) were  
159 purchased from eBioscience (San Diego, CA). The human lung cancer cell lines A549  
160 were from the American Type Culture Collection. They were cultured in 90% F12K  
161 (GIBCO, USA) supplemented with 10% fetal bovine serum in a humidified incubator  
162 at 37°C and 5% CO<sub>2</sub>. NK92 cells (KeyGEN BioTECH, Nanjing, China) were

163 cultured in Alpha MEM (GIBCO, USA) with 2 mM L-glutamine, 1.5 g/L sodium  
164 bicarbonate, 0.2 mM inositol, 0.1 mM 2-mercaptoethanol, 0.02 mM folic acid, 100–  
165 200 U/mL recombinant human IL-2 (PeproTech, Rocky Hill, New Jersey, USA), and  
166 a final concentration of 12.5% horse serum and 12.5% fetal bovine serum.

167

### 168 ***TMPRSS2* knockdown with small interfering RNA (siRNA)**

169 A549 cells were transfected with *TMPRSS2* siRNA or control siRNA by using  
170 Effectene Transfection Reagent (Qiagen, Hilden, Germany, B00118) according to the  
171 manufacturer's instructions. The medium was replaced after 24 hours incubation with  
172 fresh medium, and the cells were maintained for a further 24 hours. Quantitative PCR  
173 or Western blotting were used to detect the transfection efficiency. *TMPRSS2* siRNA  
174 and control siRNA were synthesized by KeyGEN Biotech (Nanjing, China). Their  
175 sequences were as follows: *TMPRSS2* siRNA: 1, 5'- GGAC AUGG GCUA UAAG  
176 AAU -3' (sense) and 5'- AUUC UUAU AGCC CAUG UCC-3' (antisense); 2, 5'-  
177 ACUC CAAG ACCA AGAA CAA -3' (sense) and 5'- UUGU UCUU GGUC UUGG  
178 AGU-3' (antisense); 3, 5'-GGAC UGGA UUUA UCGA CAA-3'(sense) and 5'-UUGU  
179 CGAU AAAU CCAG UCC-3' (antisense); control siRNA: 5'-UUCU CCGA ACGU  
180 GUCA CGU dTdT-3' (sense) and 5'-ACGUGACACGUUCGGAGAA dTdT-3'  
181 (antisense).

182

### 183 **Lentivirus generation and infection**

184 Lentivirus was prepared according to the manufacturer's instructions. The  
185 heteroduplexes, supplied as 58-nucleotide oligomers, were annealed; the downstream  
186 of the U6 promoter was inserted into the pLKO.1 plasmid to generate  
187 pLKO.1/Sh*TMPRSS2*. Recombinant and control lentiviruses were produced by  
188 transiently transfecting pLKO.1/vector and pLKO.1/Sh*TMPRSS2*, respectively. The

189 lentiviruses were transfected into 293 T cells. After 48 hours, lentiviral particles were  
190 collected and concentrated from the supernatant by ultracentrifugation. Effective  
191 lentiviral shRNA was screened by infecting these viruses with Lewis cells, and their  
192 inhibitory effect on *TMPRSS2* expression was analyzed by quantitative PCR and  
193 Western blotting. The lentivirus containing the ShTMPRSS2 RNA target sequences  
194 and a control virus were used for the animal study. The coding strand sequence of the  
195 shRNA-encoding oligonucleotides was 5'-ACGGGAACGTGACGGTATTTA-3' for  
196 TMPRSS2.

197

#### 198 **Western blotting**

199 A549 cell extracts were lysed by using lysis buffer supplemented with protease  
200 inhibitor cocktail immediately before use. Total proteins present in the cell lysates  
201 were quantified by using the BCA assay. Proteins were denatured by addition of 6  
202 volumes of SDS sample buffer and boiled at 95°C for 5 min and were then separated  
203 by SDS-PAGE. The resolved proteins were transferred onto a nitrocellulose  
204 membrane after electrophoresis. The membranes were incubated with 5% skimmed  
205 milk in TBS containing 0.1% Tween 20 (TBS-T) for 1 hour to block the non-specific  
206 binding and then incubated overnight at 4°C with specific antibodies. After 2 hours  
207 incubation with the HRP-labeled secondary antibody, proteins were visualized by  
208 enhanced chemiluminescence using a G: BOX chemiXR5 digital imaging system  
209 (SYNGENE, UK). The band densities were normalized to the background, and the  
210 relative optical density ratios were calculated relative to the housekeeping gene  
211 *GAPDH*.

212

#### 213 **Quantitative PCR**



214 The total RNA was isolated by Trizol (Invitrogen, USA) and was reversely  
215 transcribed into cDNA using the RevertAid First Strand cDNA Synthesis Kit (Thermo  
216 Fisher, USA). Quantitative PCR was performed with the ABI Step one plus Real-  
217 Time PCR (RT-PCR) system (ABI, USA) using One Step TB Green™ PrimeScript™  
218 RT-PCR Kit II (SYBR Green) (RR086B, TaKaRa, JAPAN). Relative copy number  
219 was determined by calculating the fold-change difference in the gene of interest  
220 relative to GAPDH. The program for amplification was one cycle of 95°C for 5 min,  
221 followed by 40 cycles of 95°C for 15 sec, 60°C for 20 sec, and 72°C for 40 sec. The  
222 relative amount of each gene was normalized to the amount of *GAPDH*. The primer  
223 sequences were as follows: *hTMPRSS2*: 5'-AACT TCAT CCTT CAGG TGTA-3'  
224 (forward) and 5'-TCTC GTTC CAGT CGTCTT-3' (reverse); *hGAPDH*: 5'- AGAT  
225 CATC AGCA ATGC CTCCT-3' (forward) and 5'-ACAC CATG TATT CCGG  
226 GTCAAT-3' (reverse).

227

#### 228 **Cell proliferation assay**

229 A549 cells were plated in 96-well plates at  $3 \times 10^4$  cells per well and maintained in a  
230 medium containing 10% FBS. After 24 hours, cell proliferation was determined using  
231 the Cell Counting Kit-8 (CCK-8; KeyGEN Biotech, China) following the  
232 manufacturer's instructions. To perform the CCK-8 assay, 10  $\mu$ l CCK-8 reagent was  
233 added to each well and the 96 plates were incubated at 37°C for 2 hours. The optical  
234 density was read at 450 nm using a microplate reader. All these experiments were  
235 performed in triplicates.

236

#### 237 **Transwell migration and invasion assays**

238 Cell migratory and invasive abilities were assessed using 24 well transwell chambers  
239 (Corning, USA) with membrane pore size of 8.0  $\mu$ m. A549 cells were seeded into the

240 upper chamber without matrigel at  $1 \times 10^5$  cells in serum-free medium, while 500  $\mu$ l  
241 medium containing 20% FBS was added to the lower chamber. The chambers were  
242 incubated at 37°C and 5% CO<sub>2</sub> for 24 hours. The cells on the upper chamber were  
243 scraped off with cotton-tipped swabs, and cells that had migrated through the  
244 membrane were stained with 0.1% crystal violet at 37°C for 30 min. The migrated  
245 cells were counted at 200x magnification under the microscope using three randomly  
246 selected visual fields. All these experiments were performed in triplicates.

247

#### 248 **Co-culture of tumor cells with NK92 cells**

249 A transwell chamber (Corning, USA) was inserted into a six well plate to construct a  
250 co-culture system. A549 cells were seeded on the six well plate at a density of  $5 \times 10^4$   
251 cells/well, and NK92 cells were seeded on the membrane (polyethylene terephthalate,  
252 pore size of 0.4  $\mu$ m) of the transwell chamber at a density of  $5 \times 10^4$  cells/chamber.  
253 Tumor cells and NK92 cells were co-cultured in a humidified incubator at 37°C and  
254 5% CO<sub>2</sub> atmosphere for 48 hours.

255

#### 256 **EdU proliferation assay**

257 After co-culture of A549 cells with NK92 cells for 48 hours, we measured the  
258 proliferation capacity of NK92 cells by an EdU (5- ethynyl-2'-deoxyuridine; Invi-  
259 trogen, California, USA) proliferation assay. NK92 cells were plated in 96-well plates  
260 with a density of  $2 \times 10^3$  cells/well with 10  $\mu$ M EdU at 37°C for 24 hours. The cell  
261 nuclei were stained with 4',6- diamidino-2-phenylindole (DAPI) at a concentration of  
262 1  $\mu$ g/mL for 20 min. The proportion of NK92 cells incorporating EdU was detected  
263 with fluorescence microscopy. All the experiments were performed in triplicates.

264

#### 265 **In vivo experiments**

#### 266 **In vivo mouse models**

267 Lewis tumor cells were transduced with ShCon (scramble) or ShTMPRSS2 lentivirus  
268 and selected by puromycin for 7 days. The stably transfected Lewis tumor cells  
269 ( $1 \times 10^7$ /ml) were subcutaneously injected into the right armpit of recipient mice after  
270 shaving the injection site. After 5 days, when the tumor volume was approximately 4-  
271 5 mm<sup>3</sup>, the mice were randomly divided into six groups, with half of the ShCon and  
272 ShTMPRSS2 mice treated with 150 U/L PD1/PDL1 inhibitor BMS-1 (concentration  
273 500 mg/mL; i.p.) (MCE Cat. No. HY-19991) every 3 days. The tumors were isolated  
274 from mice after 15 days. Tumor volumes did not exceed the maximum allowable size  
275 according to the LJI IACUC animal experimental protocol. The tumor volume was  
276 measured every 3 days after the tumor appeared on the fifth day and was calculated as  
277 follows:  $V = 1/2 \times \text{width}^2 \times \text{length}$ .

278

#### 279 **Isolation of tumor-infiltrating lymphocytes (TILs)**

280 After the tumor tissues were separated aseptically and rinsed with cold PBS for 3  
281 times, they were excised and chopped with tweezers and scissors and were then  
282 digested with 2 mg/mL collagenase (type IV, sigma V900893) for 45 min, until no  
283 tissue mass was visible. Following digestion, lymphocytes were separated with  
284 lymphocyte separation medium, washed with PBS, and counted. The specific protocol  
285 was as follows: tumors were filtered through 70  $\mu$ M cell strainers, and the cell  
286 suspension was washed twice in culture medium by centrifugation at 1500 rpm and  
287 4°C for 10 min. After the washing, the cells were resuspended with PBS and were  
288 layered over 3 mL of 30%-100% gradient percoll (Beijing Solarbio Science &  
289 Technology, Beijing, China); this was followed by centrifugation at 2600 rpm for 25  
290 min at 25°C. The enriched TILs were obtained at the interface as a thin buffy layer,  
291 were washed with PBS three times, and finally were resuspended in FACS staining  
292 buffer for further staining procedures.

293

294 **Flow cytometry**

295 TILs were stained with CD8 (eBioscience, 11-0081-81), CD49b (eBioscience, 11-  
296 5971-81), PD-1 (eBioscience, 12-9985-81), and LAG3 (eBioscience, 12-2231-81) and  
297 were analyzed by flow cytometry. TILs were restimulated with cell stimulation  
298 cocktail (eBioscience, San Diego, California, USA), and the expression of IFN- $\gamma$  and  
299 TNF- $\alpha$  (Biolegend) was analyzed by flow cytometry. Staining for cell surface markers  
300 was performed by incubating cells with antibody (1:100 dilution) in FACS buffer  
301 (0.1% BSA in PBS) for 30 min at 4°C. Surface markers of intracellular cytokines  
302 (IFN- $\gamma$  (eBioscience, 17-7311-81) and TNF- $\alpha$  (eBioscience, 12-7321-81)) were  
303 stained before fixation/permeabilization (Intracellular Fixation & Permeabilization  
304 Buffer Set, ThermoFisher).

305

306 **Immunofluorescence of CD8, CD49b and PD-L1**

307 Paraffin-embedded mice tumor tissue sections (3  $\mu$ m thick) were subjected to  
308 immunofluorescence with CD8 (Abcam, ab22378), CD49b (Abcam, ab181548), or  
309 PD-L1 (Abcam, ab2134808) primary antibodies. Before immunostaining, tumor  
310 tissue sections were deparaffinized with xylene, rehydrated and unmasked in sodium  
311 citrate buffer (10 mM, pH 6.0), and treated with a glycine solution (2 mg/mL) to  
312 quench autofluorescence. After antigen retrieval, 3% H<sub>2</sub>O<sub>2</sub>-methanol solution  
313 blocking inactivated enzymes, and goat serum blocking, tissue slides were incubated  
314 in wet box for 2 hours at 37°C with anti-CD8, CD49b, or anti-PD-L1 rabbit primary  
315 antibodies (1:100 dilution) in blocking solution, and were then dropped with FITC  
316 (1:100 dilution) secondary antibody 50-100ul and incubated at 37° for 1 hour in the  
317 dark. The immunolabeled slides were examined with a fluorescence microscope after  
318 nuclear counterstaining with DAPI. Green, red and blue channel fluorescence images

319 were acquired with a Leica DFC310 FX 1.4-megapixel digital color camera equipped  
320 with LAS V.3.8 software (Leica Microsystems, Wetzlar, Germany). Overlay images  
321 were reconstructed by using the free-share ImageJ software.

322

## 323 **RESULTS**

### 324 **Associations between *TMPRSS2* expression and immune signatures in LUAD**

325 We found that *TMPRSS2* had a significant negative expression correlation with the  
326 infiltration levels of CD8+ T cells, which represent the adaptive antitumor immune  
327 response, in three of the five LUAD cohorts (Spearman correlation,  $p < 0.05$ ) (Figure  
328 1A). *TMPRSS2* expression levels were also significantly and negatively correlated  
329 with the infiltration levels of NK cells, which represent the innate antitumor immune  
330 response, in two LUAD cohorts ( $p < 0.05$ ) (Figure 1A). Moreover, *TMPRSS2*  
331 expression levels were negatively correlated with immune cytolytic activity, a marker  
332 for underlying immunity [18], in all the five LUAD cohorts. Meanwhile, *TMPRSS2*  
333 had a significant negative expression correlation with *PD-L1* in the five LUAD  
334 cohorts (Figure 1A). *TMPRSS2* expression levels were negatively correlated with the  
335 infiltration levels of CD4+ regulatory T cells and MDSCs in four LUAD cohorts,  
336 which represent tumor immunosuppressive signatures (Figure 1A). Taken together,  
337 these results suggest a significant negative association between *TMPRSS2* abundance  
338 and immune infiltration levels in LUAD. Interestingly, *TMPRSS2* expression levels  
339 showed a significant positive correlation with the ratios of immune-  
340 stimulatory/immune-inhibitory signatures (CD8+ T cells/PD-L1) consistently in the  
341 five LUAD cohorts (Pearson correlation,  $p < 0.05$ ) (Figure 1B). It indicated that  
342 *TMPRSS2* levels had a stronger negative correlation with immune-inhibitory  
343 signatures than with immune-stimulatory signatures. Furthermore, we found that the

344 ratios of immune-stimulatory/immune-inhibitory signatures were positively correlated  
345 with DFS in the TCGA-LUAD cohort (log-rank test,  $p = 0.01$ ) (Figure 1C).

346

347 **Associations between *TMPRSS2* expression and oncogenic pathways, tumor**  
348 **phenotypes and prognosis in LUAD**

349 We found that *TMPRSS2* expression levels were inversely correlated with the  
350 activities of the cell cycle, mismatch repair, and p53 signaling pathways in the five  
351 LUAD cohorts (Spearman correlation,  $p < 0.001$ ) (Figure 2A). Moreover, *TMPRSS2*  
352 showed a negative expression correlation with *MKI67*, a tumor proliferation marker,  
353 in the five LUAD cohorts (Pearson correlation,  $p < 0.001$ ) (Figure 2B). Tumor  
354 stemness indicates a stem cell-like tumor phenotype representing an unfavorable  
355 prognosis in cancer [19]. We observed that *TMPRSS2* expression levels were  
356 inversely correlated with tumor stemness scores in these LUAD cohorts (Spearman  
357 correlation,  $p < 0.001$ ) (Figure 2C).

358 We detected that *TMPRSS2* expression levels significantly decreased with tumor  
359 advancement in LUAD (Figure 2D). For example, in the TCGA-LUAD cohort,  
360 *TMPRSS2* expression levels were significantly lower in late-stage (Stage III-IV) than  
361 in early-stage (Stage I-II) LUADs (Student's  $t$  test,  $p < 0.001$ ; fold change (FC) = 1.6),  
362 in large-size (T3-4) than in small-size (T1-2) LUADs ( $p = 0.007$ ; FC = 1.5), in  
363 LUADs with lymph nodes (N1-3) than in those without regional lymph nodes (N0) ( $p$   
364 = 0.02; FC = 1.3), and in LUADs with metastasis (M1) than in those without  
365 metastasis (M0) ( $p = 0.07$ ; FC = 1.6). In other two LUAD cohorts (GSE30219 and  
366 GSE50081) with tumor size and lymph nodes data available, *TMPRSS2* expression  
367 levels were also significantly lower in large-size than in small-size LUADs ( $p < 0.001$ ;  
368 FC = 6.4) in GSE30219 and were significantly lower in N1-3 than in N0 LUADs in

369 both GSE30219 ( $p = 0.02$ ; FC = 2.83) and GSE50081 ( $p = 0.02$ ; FC = 1.6) (Figure  
370 2D). Furthermore, the lung cancer data from Jiangsu Cancer Hospital supported that  
371 *TMPRSS2* expression levels were reduced in late-stage (Stage IV) than in early-stage  
372 (Stage I-II) LUADs ( $p < 0.001$ ; FC = 1.6) (Figure 2E). Survival analyses showed that  
373 *TMPRSS2* downregulation was correlated with worse OS and/or DFS in these LUAD  
374 cohorts (log-rank test,  $p < 0.05$ ) (Figure 2F).

375 It has been shown that *EGFR*-mutated LUADs have a better prognosis than  
376 *EGFR*-wildtype LUADs [20]. We found that *TMPRSS2* was more lowly expressed in  
377 *EGFR*-wildtype than in *EGFR*-mutated LUADs ( $p = 0.006$ ; FC = 1.5) (Figure 2G).  
378 Besides, LUAD harbors three transcriptional subtypes: terminal respiratory unit  
379 (TRU), proximal-inflammatory (PI), and proximal-proliferative (PP), of which TRU  
380 has the best prognosis [21]. We found that *TMPRSS2* expression levels were the  
381 highest in TRU (TRU versus PP:  $p = 8.68 \times 10^{-14}$ , FC = 2.98; TRU versus PI:  $p =$   
382  $1.07 \times 10^{-11}$ , FC = 3.16) (Figure 2G).

383 Taken together, these results suggest that *TMPRSS2* downregulation is associated  
384 with worse outcomes in LUAD.

385

### 386 **Association between *TMPRSS2* expression and genomic instability in LUAD**

387 Genomic instability plays prominent roles in cancer initiation, progression, and  
388 immune invasion [22] by increasing TMB [23] and aneuploidy or somatic copy  
389 number alterations [24]. In the TCGA-LUAD cohort, *TMPRSS2* expression levels had  
390 a negative correlation with TMB (Spearman correlation,  $\rho = -0.31$ ;  $p = 2.58 \times 10^{-12}$ )  
391 (Figure 3A). Homologous recombination deficiency (HRD) may promote  
392 chromosomal instability and aneuploidy levels in cancer [25]. We found that  
393 *TMPRSS2* expression levels were inversely correlated with HRD scores [25] in

394 LUAD ( $\rho = -0.27$ ;  $p = 5.76 \times 10^{-10}$ ) (Figure 3B). DNA damage repair (DDR)  
395 deficiency can lead to genomic instability [26]. Knijnenburg et al. [25] identified  
396 deleterious gene mutations for nine DDR pathways in TCGA cancers. We divided  
397 LUAD into pathway-wildtype and pathway-mutated subtypes for each of the nine  
398 DDR pathways. The pathway-wildtype indicates no deleterious mutations in any  
399 pathway genes, and the pathway-mutated indicates at least a deleterious mutation in  
400 pathway genes. Interestingly, we found that *TMPRSS2* expression levels were  
401 significantly lower in the pathway-mutated subtype than in the pathway-wildtype  
402 subtype for seven DDR pathways ( $p < 0.05$ ;  $FC > 1.5$ ) (Figure 3C). The seven  
403 pathways included base excision repair, Fanconi anemia, homologous recombination,  
404 mismatch repair, nucleotide excision repair, translesion DNA synthesis, and damage  
405 sensor. These results suggest a correlation between *TMPRSS2* downregulation and  
406 DDR deficiency.

407 *TP53* mutations often leads to genomic instability because of the important role of  
408 p53 in maintaining genomic stability [27]. We found that *TMPRSS2* displayed  
409 significantly lower expression levels in *TP53*-mutated than in *TP53*-wildtype LUADs  
410 ( $p = 0.006$ ;  $FC = 1.5$ ) (Figure 3D). Moreover, we found numerous DDR-associated  
411 genes having significant negative expression correlations with *TMPRSS2* in these  
412 LUAD cohorts (Pearson correlation,  $p < 0.05$ ), including *MSH2*, *MSH6*, *POLE*,  
413 *PCNA*, and *RAD51* (Figure 3E). Furthermore, we observed significant negative  
414 expression correlations between *TMPRSS2* and DNA mismatch repair proteins *MSH6*  
415 (Pearson correlation,  $r = -0.30$ ;  $p = 6.6 \times 10^{-9}$ ) and *PCNA* ( $r = -0.25$ ;  $p = 1.5 \times 10^{-6}$ ) in  
416 the TCGA-LUAD cohort (Figure 3F). These results indicated an association between  
417 *TMPRSS2* downregulation and the upregulation of DDR molecules, the signature of  
418 increased genomic instability.



419 Genomic instability can promote tumor heterogeneity, which is associated with  
420 tumor progression, immune evasion, and drug resistance [28]. We used the DEPTH  
421 algorithm [29] to score ITH for each TCGA-LUAD sample and found a significant  
422 negative correlation between *TMPRSS2* expression levels and ITH scores in LUAD ( $\rho$   
423 = -0.55;  $p < 0.001$ ) (Figure 3G). It indicates a significant association between  
424 *TMPRSS2* downregulation and increased ITH in LUAD.

425 Taken together, these results suggest that *TMPRSS2* downregulation is associated  
426 with enhanced genomic instability in LUAD.

427

#### 428 **Co-expression networks of *TMPRSS2* in LUAD**

429 We found 150 and 135 genes having strong positive and negative expression  
430 correlations with *TMPRSS2* in the TCGA-LUAD cohort, respectively (Pearson  
431 correlation,  $|r| > 0.5$ ) (Figure 4A; Supplementary Table S3). GSEA [14] revealed that  
432 the cell cycle, p53 signaling, mismatch repair, and homologous recombination  
433 pathways were significantly associated with the 135 genes with strong negative  
434 expression correlations with *TMPRSS2*. This conforms to the previous findings that  
435 *TMPRSS2* downregulation was correlated with increased activities of these pathways.

436 WGCNA [17] identified six gene modules (indicated in blue, turquoise, brown,  
437 magenta, purple, and pink color, respectively) highly enriched in the high-*TMPRSS2*-  
438 expression-level LUADs. The representative GO terms associated with these modules  
439 included cell projection, chromosome segregation, response to endogenous stimulus,  
440 cell adhesion, cellular response to lipopolysaccharide, and micro-ribonucleoprotein  
441 complex. In contrast, three gene modules (indicated in green, black, and green-yellow  
442 color, respectively) were highly enriched in the low-*TMPRSS2*-expression-level  
443 LUADs (Figure 4B). The representative GO terms for these modules included

444 extracellular matrix (ECM), small molecule metabolic process, and postsynapse  
445 (Figure 4B). The ECM signature plays a crucial role in driving cancer progression  
446 [30]. Its upregulation in the low-*TMPRSS2*-expression-level LUADs is in accordance  
447 with the correlation between *TMPRSS2* downregulation and LUAD progression.

448

#### 449 **Experimental validation of the bioinformatics findings**

450 To validate the findings from the bioinformatics analysis, we performed in vitro  
451 experiments with the human LUAD cell line A549 and in vivo experiments with  
452 mouse tumor models. We found that *TMPRSS2* knockdown markedly  
453 promoted proliferation and invasion potential in A549 cells (Figure 5A) and increased  
454 tumor volume and progression in Lewis tumor mouse models (Figure 5B). This is  
455 consistent with the previous results showing that *TMPRSS2* downregulation is  
456 associated with tumor progression and unfavorable prognosis in LUAD. Furthermore,  
457 in vitro experiments showed that *MSH6* expression was upregulated in *TMPRSS2*-  
458 knockdown versus *TMPRSS2*-wildtype A549 cells (Figure 5C). This is in agreement  
459 with the previous finding of the significant negative correlation between *TMPRSS2*  
460 expression levels and *MSH6* abundance in LUAD.

461 Our bioinformatics analysis revealed a significant inverse correlation between  
462 *TMPRSS2* abundance and immune infiltration levels in LUAD. Consistently, the  
463 MHC class I genes (*HLA-A*, *HLA-B*, and *HLA-C*) showed significantly higher  
464 expression levels in *TMPRSS2*-knockdown than in *TMPRSS2*-wildtype A549 cells,  
465 demonstrated by real-time qPCR (Figure 5D). NK cells co-cultured with *TMPRSS2*-  
466 knockdown A549 cells displayed significantly stronger proliferation ability than NK  
467 cells co-cultured with *TMPRSS2*-wildtype A549 cells, evident by the EdU  
468 proliferation assay (Figure 5E). Furthermore, in vivo experiments showed that

469 infiltration of CD8<sup>+</sup> T cells and NK cells significantly increased in *TMPRSS2*-  
470 knockdown tumors (Figure 5F). Moreover, on CD8<sup>+</sup> T cells from TILs in *TMPRSS2*-  
471 knockdown tumors, the expression of TNF- $\alpha$  and IFN- $\gamma$  were significantly  
472 upregulated (Figure 5G, H), indicating that *TMPRSS2* knockdown can enhance the  
473 activity of CD8<sup>+</sup> TILs. Meanwhile, the expression of PD-1 and LAG3 also  
474 significantly increased on CD8<sup>+</sup> TILs in *TMPRSS2*-knockdown tumors (Figure 5I, J),  
475 indicating that *TMPRSS2* deficiency can also promote the exhaustion of CD8<sup>+</sup> TILs.

476 Our bioinformatics analysis revealed a significant negative correlation between  
477 *TMPRSS2* and *PD-L1* expression levels. This result was confirmed by both in vitro  
478 and in vivo experiments; knockdown of *TMPRSS2* increased PD-L1 expression in  
479 A549 cells, as evidenced by Western blotting (Figure 5C); *TMPRSS2*-knockdown  
480 tumors had significantly enhanced PD-L1 expression (Figure 5F). Furthermore,  
481 bioinformatics analysis revealed a significant positive correlation between *TMPRSS2*  
482 expression levels and the ratios of CD8<sup>+</sup> T cells/PD-L1. This was confirmed by that  
483 *TMPRSS2*-knockdown tumors displayed a higher level of increases in CD8<sup>+</sup> T cell  
484 infiltration than in PD-L1 abundance (Figure 5F). Because PD-L1 expression is a  
485 predictive biomarker of response to immune checkpoint inhibitors (ICIs) in cancer  
486 [31], we anticipated that knockdown of *TMPRSS2* would promote the response to  
487 ICIs in LUAD. As expected, the volume of the *TMPRSS2*-knockdown tumors had a  
488 significantly higher level of decreases than that of *TMPRSS2*-wildtype tumors after  
489 treatment with BMS-1, an inhibitor of PD-1/PD-L1 (Figure 5K); this result supports  
490 that knockdown of *TMPRSS2* can enhance the sensitivity of LUAD to the PD-1/PD-  
491 L1 inhibitor. Furthermore, the activities of CD8<sup>+</sup> TILs and NK TILs markedly  
492 increased in *TMPRSS2*-knockdown tumors after treatment with BMS-1; they were  
493 significantly higher in *TMPRSS2*-knockdown than in *TMPRSS2*-wildtype tumors after

494 treatment with BMS-1 (Figure 5L, M). These results support that the PD-1/PD-L1  
495 inhibitor promotes immune elimination of tumor cells by inhibiting the exhaustion of  
496 CD8<sup>+</sup> TILs and NK TILs in *TMPRSS2*-depleted LUAD.

497 To summarize, bioinformatics analysis revealed a negative correlation between  
498 *TMPRSS2* abundance and immune infiltration levels in LUAD. Experimental results  
499 demonstrated that this relationship was a causal relationship. That is, reduced  
500 *TMPRSS2* abundance can boost immune infiltration for LUAD.

501

## 502 **DISCUSSION**

503 As a pivotal molecule in the regulation of SARS-CoV-2 invading human host cells,  
504 *TMPRSS2* is attracting massive attention in the current SARS-CoV-2 pandemic [32-  
505 34]. Because SARS-CoV-2 has and is infecting large numbers of people, including  
506 many cancer patients, an investigation into the role of *TMPRSS2* in cancer may  
507 provide valuable advice for treating cancer patients infected with SARS-CoV-2.  
508 Previous studies of *TMPRSS2* in cancer mainly focused on its oncogenic role in  
509 prostate cancer [6-8]. In this study, we focused on LUAD, considering that it is the  
510 most common histological type in lung cancer and that the lungs are the primary  
511 organ SARS-CoV-2 attacks. In contrast to its oncogenic role in prostate cancer,  
512 *TMPRSS2* plays a tumor suppressive role in LUAD, as we have provided abundant  
513 evidence. First, *TMPRSS2* downregulation correlates with elevated activities of many  
514 oncogenic pathways in LUAD, including cell cycle, mismatch repair, p53, and ECM  
515 signaling. Second, *TMPRSS2* downregulation correlates with increased tumor cell  
516 proliferation, stemness, genomic instability, and ITH in LUAD. Finally, *TMPRSS2*  
517 downregulation is associated with tumor advancement and worse survival in LUAD.  
518 Furthermore, both in vitro and in vivo experiments demonstrated that *TMPRSS2*

519 downregulation markedly promoted the proliferation and invasion capacity of LUAD  
520 cells, supporting the tumor suppressor role of *TMPRSS2* in LUAD.

521 Our bioinformatics analysis revealed significant negative associations between  
522 *TMPRSS2* expression and immune signatures, including both immune-stimulatory and  
523 immune-inhibitory signatures, in LUAD (Figure 1A). Nevertheless, *TMPRSS2*  
524 expression tended to have a stronger negative correlation with immune-inhibitory  
525 signatures than with immune-stimulatory signatures in LUAD (Figure 1B). The  
526 significant different levels of correlations of immune-stimulatory and immune-  
527 inhibitory signatures with *TMPRSS2* expression could be a factor responsible for the  
528 worse prognosis in LUAD patients with *TMPRSS2* deficiency. Furthermore, the  
529 associations between *TMPRSS2* and tumor immunity in LUAD were completely  
530 verified by both in vitro and in vivo experiments. That is, knockdown of *TMPRSS2*  
531 significantly increased tumor immunogenicity and immune cell infiltration in LUAD.  
532 On the other hand, both computational and experimental data showed that *TMPRSS2*  
533 downregulation significantly enhanced PD-L1 expression in LUAD. Because both  
534 inflamed tumor microenvironment and PD-L1 expression are determinants of  
535 cancer response to immunotherapy [35], *TMPRSS2*-depleted LUAD would respond  
536 better to immunotherapy than *TMPRSS2*-wildtype LUAD. This was supported by our  
537 in vivo experiments showing that *TMPRSS2*-knockdown tumors were more sensitive  
538 to the PD-1/PD-L1 inhibitor. Thus, *TMPRSS2* downregulation is a positive biomarker  
539 of immunotherapy for LUAD. In addition, because *TMPRSS2* downregulation often  
540 occurs in advanced LUAD, it indicates that advanced LUAD could benefit more from  
541 immunotherapy than early-stage LUAD.

542 *TMPRSS2* inhibition has been indicated as a strategy for preventing and treating  
543 SARS-CoV-2 infection for the crucial role of *TMPRSS2* in the SARS-CoV-2

544 invasion [33, 36]. However, our data suggest that this strategy may not be a good  
545 option for lung cancer patients in terms of the tumor suppressor role of *TMPRSS2* in  
546 LUAD. Interestingly, we found that *TMPRSS2* displayed significantly higher  
547 expression levels in non-smoker than in smoker LUAD patients in four LUAD cohorts  
548 in which related data were available (Student's *t* test,  $p < 0.05$ , FC > 1.5) (Figure 6A).  
549 This result indicates that non-smoker LUAD patients could be more susceptible to  
550 SARS-CoV-2 infection than smoker LUAD patients. As expected, non-smoker  
551 LUAD patients had significantly lower TMB and antitumor immunity than smoker  
552 LUAD patients (Figure 6B), consistent with findings from previous studies [37, 38].

553

## 554 **CONCLUSIONS**

555 *TMPRSS2* is a tumor suppressor in LUAD, as evidenced by its downregulation  
556 correlated with increased genomic instability and ITH, tumor progression, and  
557 unfavorable clinical outcomes in LUAD. However, *TMPRSS2* downregulation is a  
558 positive biomarker of immunotherapy for LUAD. Our data provide implications in the  
559 connection between lung cancer and pneumonia caused by SARS-CoV-2 infection.

560

## 561 **Declarations**

### 562 **Ethics approval and consent to participate**

563 The study was done in accordance with both the Declaration of Helsinki and the  
564 International Conference on Harmonization Good Clinical Practice guidelines and  
565 was approved by the institutional review board.

### 566 **Consent for publication**

567 Not applicable.

### 568 **Availability of data and material**

569 The five LUAD genomic datasets were obtained from the Genomic Data Commons  
570 Data Portal (<https://portal.gdc.cancer.gov/>) and the Gene Expression Omnibus  
571 (<https://www.ncbi.nlm.nih.gov/geo/>).

### 572 **Competing Interests**

573 The authors declare that they have no competing interests.

### 574 **Funding**

575 This work was supported by the China Pharmaceutical University (grant number  
576 3150120001 to XW), Natural Science Foundation of Jiangsu Province ( grant number  
577 BK20201090 to ZL), and China Postdoctoral Science Foundation (grant number  
578 2021M691338 to ZL)

### 579 **Authors' contributions**

580 **Zhixian Liu:** Validation, Formal analysis, Resources, Investigation, Data curation,  
581 Visualization, Writing - original draft, Funding acquisition. **Zhilan Zhang:** Software,  
582 Formal analysis, Investigation, Data curation, Visualization. **Qiushi Feng:** Software,  
583 Formal analysis, Visualization. **Xiaosheng Wang:** Conceptualization, Methodology,  
584 Resources, Investigation, Writing - original draft, Writing - review & editing,  
585 Supervision, Project administration, Funding acquisition.

### 586 **Acknowledgements**

587

588

### 589 **List of Abbreviations**

590 **ACE2:** angiotensin-converting enzyme 2; **CCK-8:** the Cell Counting Kit-8; **DAPI:**  
591 4',6- diamidino-2-phenylindole; **DDR:** DNA damage repair; **DFS:** disease-free  
592 survival; **ECM:** extracellular matrix; **FC:** fold change; **FDR:** false discovery rate; **GO:**  
593 gene ontology; **GSEA:** gene set enrichment analysis; **HRD:** Homologous  
594 recombination deficiency; **ICIs:** immune checkpoint inhibitors; **ITH:** intratumor  
595 heterogeneity; **LUAD:** lung adenocarcinoma; **LUSC:** lung squamous cell carcinoma;  
596 **MDSCs:** myeloid-derived suppressor cells; **OS:** overall survival; **PI:** proximal-  
597 inflammatory; **PP:** proximal-proliferative; **RT-PCR:** Real-Time PCR; **S:** spike  
598 glycoprotein; **SARS-CoV-2:** severe acute respiratory syndrome coronavirus 2; **siRNA:**  
599 small interfering RNA; **ssGSEA:** single-sample gene-set enrichment analysis; **TCGA:**  
600 The Cancer Genome Atlas; **TILs:** tumor-infiltrating lymphocytes; **TMB:** tumor

601 mutation burden; **TMPRSS2**: transmembrane protease serine 2; **TRU**: terminal  
602 respiratory unit; **WGCNA**: weighted gene co-expression network analysis

603

## 604 **References**

- 605 1. Ou, X., et al., Characterization of spike glycoprotein of SARS-CoV-2 on virus entry and its  
606 immune cross-reactivity with SARS-CoV. *Nat Commun*, 2020. 11(1): p. 1620.
- 607 2. Tomlins, S.A., et al., Role of the TMPRSS2-ERG gene fusion in prostate cancer. *Neoplasia*,  
608 2008. 10(2): p. 177-88.
- 609 3. Katopodis, P., et al., Pancancer analysis of transmembrane protease serine 2 and cathepsin L  
610 that mediate cellular SARSCoV2 infection leading to COVID-19. *Int J Oncol*, 2020. 57(2): p.  
611 533-539.
- 612 4. Kong, Q., et al., Analysis of the susceptibility of lung cancer patients to SARS-CoV-2 infection.  
613 *Mol Cancer*, 2020. 19(1): p. 80.
- 614 5. Bao, R., et al., ACE2 and TMPRSS2 expression by clinical, HLA, immune, and microbial  
615 correlates across 34 human cancers and matched normal tissues: implications for SARS-CoV-  
616 2 COVID-19. *J Immunother Cancer*, 2020. 8(2).
- 617 6. Mollica, V., A. Rizzo, and F. Massari, The pivotal role of TMPRSS2 in coronavirus disease 2019  
618 and prostate cancer. *Future Oncol*, 2020.
- 619 7. Trifunovski, A., et al., Detection of TMPRSS2-ERG Fusion Transcript in Biopsy Specimen of  
620 Prostate Cancer Patients: A Single Centre Experience. *Pril (Makedon Akad Nauk Umet Odd*  
621 *Med Nauki)*, 2020. 41(1): p. 5-14.
- 622 8. Dudka, I., et al., Comprehensive metabolomics analysis of prostate cancer tissue in relation  
623 to tumor aggressiveness and TMPRSS2-ERG fusion status. *BMC Cancer*, 2020. 20(1): p. 437.
- 624 9. Luo, L., et al., TMPRSS2 Correlated With Immune Infiltration Serves as a Prognostic  
625 Biomarker in Prostatic Adenocarcinoma: Implication for the COVID-2019. *Front Genet*, 2020.  
626 11: p. 575770.
- 627 10. Ding, L., et al., Somatic mutations affect key pathways in lung adenocarcinoma. *Nature*, 2008.  
628 455(7216): p. 1069-75.
- 629 11. Rousseaux, S., et al., Ectopic activation of germline and placental genes identifies aggressive  
630 metastasis-prone lung cancers. *Sci Transl Med*, 2013. 5(186): p. 186ra66.
- 631 12. Okayama, H., et al., Identification of genes upregulated in ALK-positive and EGFR/KRAS/ALK-  
632 negative lung adenocarcinomas. *Cancer Res*, 2012. 72(1): p. 100-11.
- 633 13. Der, S.D., et al., Validation of a histology-independent prognostic gene signature for early-  
634 stage, non-small-cell lung cancer including stage IA patients. *J Thorac Oncol*, 2014. 9(1): p.  
635 59-64.
- 636 14. Hanzelmann, S., R. Castelo, and J. Guinney, GSEA: gene set variation analysis for microarray  
637 and RNA-seq data. *BMC Bioinformatics*, 2013. 14: p. 7.
- 638 15. Subramanian, A., et al., Gene set enrichment analysis: a knowledge-based approach for  
639 interpreting genome-wide expression profiles. *Proc Natl Acad Sci U S A*, 2005. 102(43): p.  
640 15545-50.
- 641 16. Kanehisa, M., et al., KEGG: new perspectives on genomes, pathways, diseases and drugs.  
642 *Nucleic Acids Res*, 2017. 45(D1): p. D353-D361.
- 643 17. Langfelder, P. and S. Horvath, WGCNA: an R package for weighted correlation network  
644 analysis. *BMC Bioinformatics*, 2008. 9: p. 559.
- 645 18. Takahashi, H., et al., Immune Cytolytic Activity for Comprehensive Understanding of Immune  
646 Landscape in Hepatocellular Carcinoma. *Cancers (Basel)*, 2020. 12(5).
- 647 19. Miranda, A., et al., Cancer stemness, intratumoral heterogeneity, and immune response  
648 across cancers. *Proc Natl Acad Sci U S A*, 2019. 116(18): p. 9020-9029.
- 649 20. Li, W.Y., et al., The role of EGFR mutation as a prognostic factor in survival after diagnosis of  
650 brain metastasis in non-small cell lung cancer: a systematic review and meta-analysis. *BMC*  
651 *Cancer*, 2019. 19(1): p. 145.
- 652 21. Comprehensive molecular profiling of lung adenocarcinoma. *Nature*, 2014. 511(7511): p.  
653 543-50.



- 654 22. Ferguson, L.R., et al., Genomic instability in human cancer: Molecular insights and  
655 opportunities for therapeutic attack and prevention through diet and nutrition. *Semin*  
656 *Cancer Biol*, 2015. 35 Suppl: p. S5-S24.
- 657 23. Palmieri, G., et al., Genetic instability and increased mutational load: which diagnostic tool  
658 best direct patients with cancer to immunotherapy? *J Transl Med*, 2017. 15(1): p. 17.
- 659 24. Smith, J.C. and J.M. Sheltzer, Systematic identification of mutations and copy number  
660 alterations associated with cancer patient prognosis. *Elife*, 2018. 7.
- 661 25. Knijnenburg, T.A., et al., Genomic and Molecular Landscape of DNA Damage Repair  
662 Deficiency across The Cancer Genome Atlas. *Cell Rep*, 2018. 23(1): p. 239-254 e6.
- 663 26. McKinney, J.A., et al., Distinct DNA repair pathways cause genomic instability at alternative  
664 DNA structures. *Nat Commun*, 2020. 11(1): p. 236.
- 665 27. Eischen, C.M., Genome Stability Requires p53. *Cold Spring Harb Perspect Med*, 2016. 6(6).
- 666 28. Burrell, R.A., et al., The causes and consequences of genetic heterogeneity in cancer  
667 evolution. *Nature*, 2013. 501(7467): p. 338-45.
- 668 29. Li, M., et al., An algorithm to quantify intratumor heterogeneity based on alterations of gene  
669 expression profiles. *Commun Biol*, 2020. 3(1): p. 505.
- 670 30. Walker, C., E. Mojares, and A. Del Rio Hernandez, Role of Extracellular Matrix in  
671 Development and Cancer Progression. *Int J Mol Sci*, 2018. 19(10).
- 672 31. Patel, S.P. and R. Kurzrock, PD-L1 Expression as a Predictive Biomarker in Cancer  
673 Immunotherapy. *Mol Cancer Ther*, 2015. 14(4): p. 847-56.
- 674 32. Zang, R., et al., TMPRSS2 and TMPRSS4 promote SARS-CoV-2 infection of human small  
675 intestinal enterocytes. *Sci Immunol*, 2020. 5(47).
- 676 33. Hoffmann, M., et al., SARS-CoV-2 Cell Entry Depends on ACE2 and TMPRSS2 and Is Blocked  
677 by a Clinically Proven Protease Inhibitor. *Cell*, 2020. 181(2): p. 271-280 e8.
- 678 34. Bestle, D., et al., TMPRSS2 and furin are both essential for proteolytic activation of SARS-CoV-  
679 2 in human airway cells. *Life Sci Alliance*, 2020. 3(9).
- 680 35. Cristescu, R., et al., Pan-tumor genomic biomarkers for PD-1 checkpoint blockade-based  
681 immunotherapy. *Science*, 2018. 362(6411): p. 197-+.
- 682 36. Stopsack, K.H., et al., TMPRSS2 and COVID-19: Serendipity or Opportunity for Intervention?  
683 *Cancer Discov*, 2020. 10(6): p. 779-782.
- 684 37. Chae, Y.K., et al., Association of Tumor Mutational Burden With DNA Repair Mutations and  
685 Response to Anti-PD-1/PD-L1 Therapy in Non-Small-Cell Lung Cancer. *Clin Lung Cancer*, 2019.  
686 20(2): p. 88-96 e6.
- 687 38. Kinoshita, T., et al., Determination of poor prognostic immune features of tumour  
688 microenvironment in non-smoking patients with lung adenocarcinoma. *Eur J Cancer*, 2017.  
689 86: p. 15-27.
- 690
- 691

## 692 **Figures**

### 693 **Figure 1 Association between *TMPRSS2* expression and immune signatures in**

694 **LUAD. (A)** Correlations between *TMPRSS2* expression levels and the enrichment  
695 levels of CD8+ T cells and NK cells, immune cytolytic activity, *PD-L1* expression  
696 levels, and the enrichment levels of CD4+ regulatory T cells and MDSCs in five  
697 LUAD cohorts. The Spearman or Pearson correlation coefficients ( $\rho$  or  $r$ ) and  $p$   
698 values are shown. **(B)** Pearson correlations between *TMPRSS2* expression levels and  
699 the ratios of immune-stimulatory/immune-inhibitory signatures (CD8+/PD-L1) in  
700 LUAD. **(C)** Kaplan-Meier survival curves showing a better disease-free survival in  
701 LUAD patients with high ratios of CD8+/PD-L1 (upper third) than those with low  
702 ratios of CD8+/PD-L1 (bottom third). The log-rank test  $p$  value is shown. \*  $p < 0.05$ ,  
703 \*\*  $p < 0.01$ , \*\*\*  $p < 0.001$ , <sup>ns</sup>  $p \geq 0.05$ . They also apply to the following figures.

### 704 **Figure 2. Associations between *TMPRSS2* expression and oncogenic pathways,**

705 **tumor phenotypes and prognosis in LUAD.** The inverse correlations between  
706 *TMPRSS2* expression levels and the activities of oncogenic pathways **(A)**, *MKI67*  
707 expression levels **(B)**, and stemness scores **(C)** in LUAD. The Spearman or Pearson  
708 correlation coefficients ( $\rho$  or  $r$ ) and  $p$  values are shown. **(D)** Comparisons of  
709 *TMPRSS2* expression levels between late-stage (Stage III-IV) and early-stage (Stage  
710 I-II), between large-size (T3-4) and small-size (T1-2), and between N1-3 (lymph  
711 nodes) and N0 (without regional lymph nodes) LUADs. The Student's  $t$  test  $p$  values  
712 and fold change (FC) of mean *TMPRSS2* expression levels are shown. **(E)** The lung  
713 cancer data from Jiangsu Cancer Hospital showing that *TMPRSS2* expression levels  
714 are significantly lower in late-stage (Stage IV) than in early-stage (Stage I-II) LUADs.  
715 **(F)** Kaplan-Meier survival curves showing that low-*TMPRSS2*-expression-level  
716 (bottom third) LUAD patients have worse OS and/or DFS than high-*TMPRSS2*-  
717 expression-level (upper third) LUAD patients. The log-rank test  $p$  values are shown.  
718 OS, overall survival. DFS, disease-free survival. **(G)** Comparisons of *TMPRSS2*  
719 expression levels between *EGFR*-mutated and *EGFR*-wildtype LUADs and between  
720 three LUAD transcriptional subtypes. TRU, terminal respiratory unit. PI, proximal-  
721 inflammatory. PP, proximal-proliferative.

### 722 **Figure 3. Association between *TMPRSS2* expression and genomic instability in**

723 **LUAD.** Spearman correlations between *TMPRSS2* expression levels and tumor  
724 mutation burden (TMB) **(A)** and homologous recombination deficiency (HRD) scores

725 **(B)** in TCGA-LUAD. TMB is the total somatic mutation count in the tumor. The  
726 HRD scores were obtained from the publication [25]. **(C)** Comparisons of *TMPRSS2*  
727 expression levels between pathway-wildtype and pathway-mutated LUAD subtypes  
728 for seven DNA damage repair (DDR) pathways in TCGA-LUAD. The pathway-  
729 wildtype indicates no deleterious mutations in any pathway genes, and the pathway-  
730 mutated indicates at least a deleterious mutation in pathway genes. BER, base  
731 excision repair. FA, Fanconi anemia. HR, homologous recombination. MMR,  
732 mismatch repair. NER, nucleotide excision repair. TLS, translesion DNA synthesis.  
733 DS, damage sensor. **(D)** Comparisons of *TMPRSS2* expression levels between *TP53*-  
734 mutated and *TP53*-wildtype LUADs. Expression correlations between *TMPRSS2* and  
735 DDR-associated genes **(E)** and proteins **(F)** in LUAD. **(G)** Spearman correlation  
736 between *TMPRSS2* expression levels and intratumor heterogeneity (ITH) scores. The  
737 ITH scores were evaluated by the DEPTH algorithm [29].

738 **Figure 4. Co-expression networks of *TMPRSS2* in LUAD.** **(A)** 150 and 135 genes  
739 having strong positive and negative expression correlations with *TMPRSS2* in TCGA-  
740 LUAD, respectively ( $|r| > 0.5$ ). **(B)** Gene modules and their representative gene  
741 ontology terms highly enriched in high- (upper third) and low-*TMPRSS2*-expression-  
742 level (bottom third) LUADs identified by WGCNA [17].

743 **Figure 5. In vivo and in vitro experimental validation of the bioinformatics**  
744 **findings.** *TMPRSS2*-knockdown tumors display increased tumor-infiltrating  
745 lymphocytes, expression of immune checkpoint molecules, and sensitization to  
746 immune checkpoint inhibitors. **(A)** *TMPRSS2* knockdown markedly  
747 promoted proliferative and invasive abilities of A549 cells. **(B)** *TMPRSS2* knockdown  
748 increased tumor volume and progression in Lewis tumor mouse models. Lewis tumor  
749 cells transfected with ShCon or Sh*TMPRSS2* lentivirus were subcutaneously injected  
750 into mice. The tumor volumes were measured every three days from the fifth day to  
751 the fifteenth. Data represent mean  $\pm$  SEM. SEM, standard error of mean.  
752 Sh*TMPRSS2* versus ShCon group,  $n = 6$  for each group, two-tailed Student's *t* test, \*  
753  $p < 0.05$ , \*\*  $p < 0.01$ , \*\*\*  $p < 0.001$ . **(C)** *TMPRSS2* knockdown increased MSH6  
754 expression in A549 cells, as evidenced by Western blotting. **(D)** *TMPRSS2*  
755 knockdown enhanced the expression of MHC class I genes (*HLA-A*, *HLA-B*, and  
756 *HLA-C*) in A549 cells, as evidenced by real-time qPCR. **(E)** NK cells co-cultured  
757 with *TMPRSS2*-knockdown A549 cells showing higher proliferation capacity than  
758 NK cells co-cultured with *TMPRSS2*-wildtype A549 cells, as evidenced by the EDU

759 proliferation assay. **(F)** CD8, CD49b, and PD-L1 immunofluorescence staining in  
760 Lewis orthotopic tumors and H-score analysis. ShTMPRSS2 versus shCon group,  $n =$   
761 6 for each group, two-tailed Student's  $t$  test, \*\*\*  $p < 0.001$ . **(G-J)** Comparisons of  
762 TNF- $\alpha$ , IFN- $\gamma$ , PD-1, and LAG3 expression on CD8+ T cells from tumor-infiltrating  
763 lymphocytes (TILs) in tumor-bearing mice between *TMPRSS2*-knockdown and  
764 *TMPRSS2*-wildtype group (ShTMPRSS2 versus ShCon group,  $n = 6$  for each group,  
765 two-tailed Student's  $t$  test, \*  $p < 0.05$ , \*\*  $p < 0.01$ , \*\*\*  $p < 0.001$ ). TILs were stained  
766 with CD3, CD8, TNF- $\alpha$ , and IFN- $\gamma$  and were then analyzed by flow cytometry.  
767 Lymphocytes were gated according to forward scatter and side scatter. CD3 and CD8  
768 staining was used to identify CD8+ T cells. **(K-M)** *TMPRSS2*-knockdown tumors  
769 formed by subcutaneous injection of Lewis cells, as mentioned in **(B)**. shCon and  
770 shTMPRSS2 tumor-bearing mice were divided into vehicle and BMS-1 groups. The  
771 vehicle and BMS-1 groups of mice were treated with solvent and BMS-1, respectively.  
772 **(K)** Representative images of tumor-bearing mice shown on the left. The right graph  
773 showing the change of tumor size in the tumor-bearing mice over time. Data represent  
774 mean  $\pm$  SEM ( $n = 6$  for each group, two-tailed Student's  $t$  test, \*  $p < 0.05$ , \*\*  $p <$   
775 0.01, \*\*\*  $p < 0.001$ ); Comparison of the volume ratios of mice tumors after and  
776 before treatment with BMS-1 between *TMPRSS2*-knockdown and *TMPRSS2*-  
777 wildtype groups (two-tailed Student's  $t$  test, \*\*\*  $p < 0.001$ ). Comparisons of TNF- $\alpha$   
778 **(L)** and IFN- $\gamma$  **(M)** expression on CD8+ T cells from TILs in tumor-bearing mice ( $n =$   
779 6 for each group, two-tailed Student's  $t$  test, \*  $p < 0.05$ , \*\*  $p < 0.01$ , \*\*\*  $p < 0.001$ ).  
780 **Figure 6. Comparisons of *TMPRSS2* expression levels, TMB, and immune**  
781 **signatures between non-smoker and smoker LUADs.** Non-smoker LUAD patients  
782 showing significantly higher *TMPRSS2* expression levels **(A)** and lower TMB and  
783 immune signature scores **(B)** than smoker LUAD patients. The two-tailed Student's  $t$   
784 test and one-tailed Mann-Whitney  $U$  test  $p$  values are shown in **(A)** and **(B)**,  
785 respectively.

786

## 787 **Supplementary data**

788 **Table S1.** A summary of the datasets analyzed.

789 **Table S2.** The marker gene sets of immune signatures, pathways, and tumor  
790 phenotypes.

791 **Table S3.** The genes with strong positive and negative expression correlations with  
792 *TMPRSS2* in the TCGA-LUAD cohort.

Figure 1

A

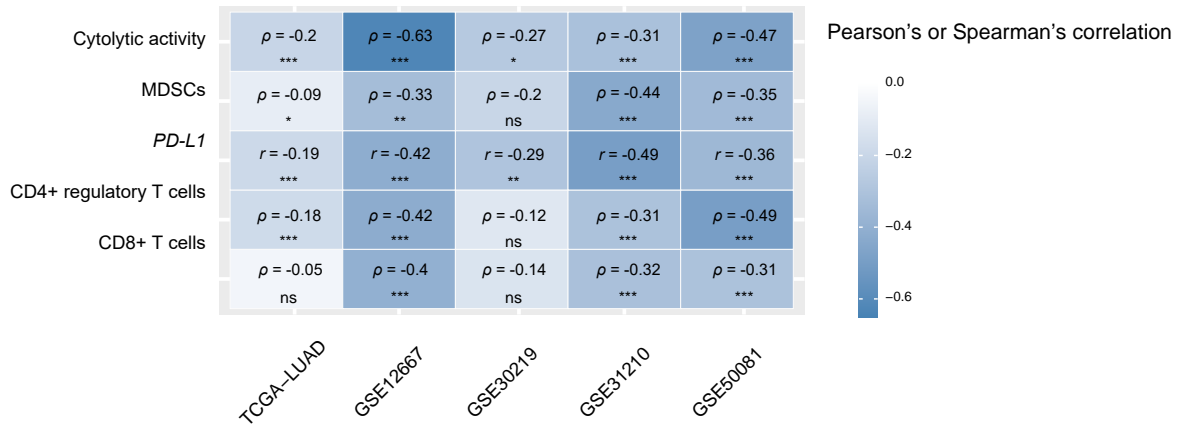

B

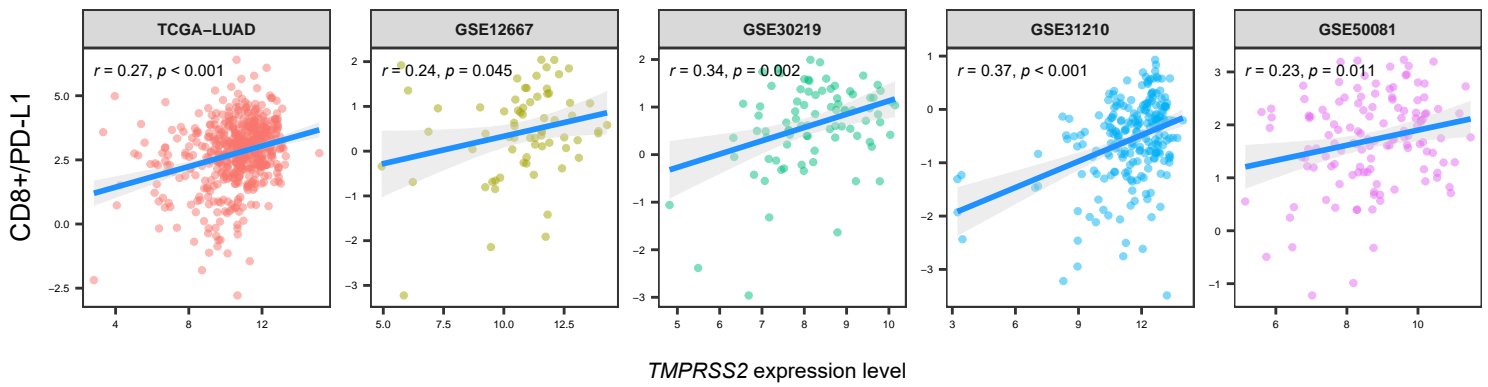

C

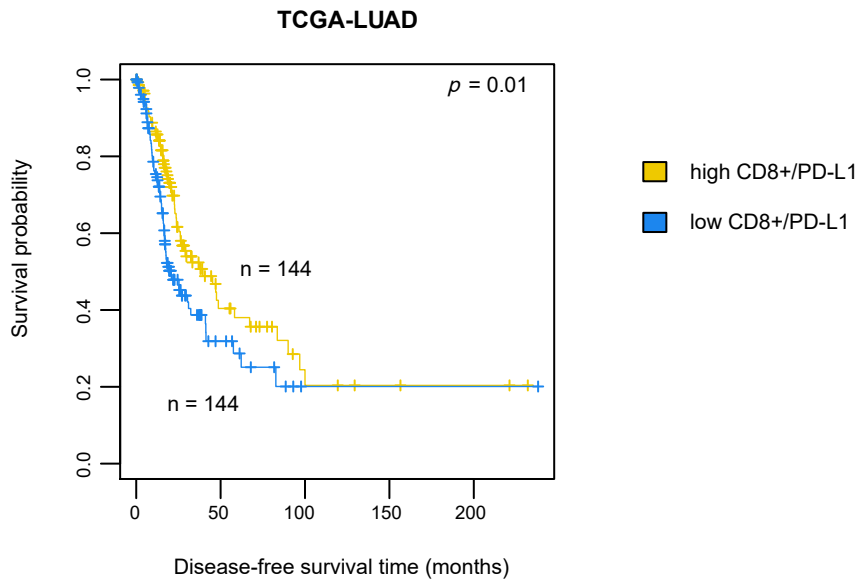

Figure 2

**A**

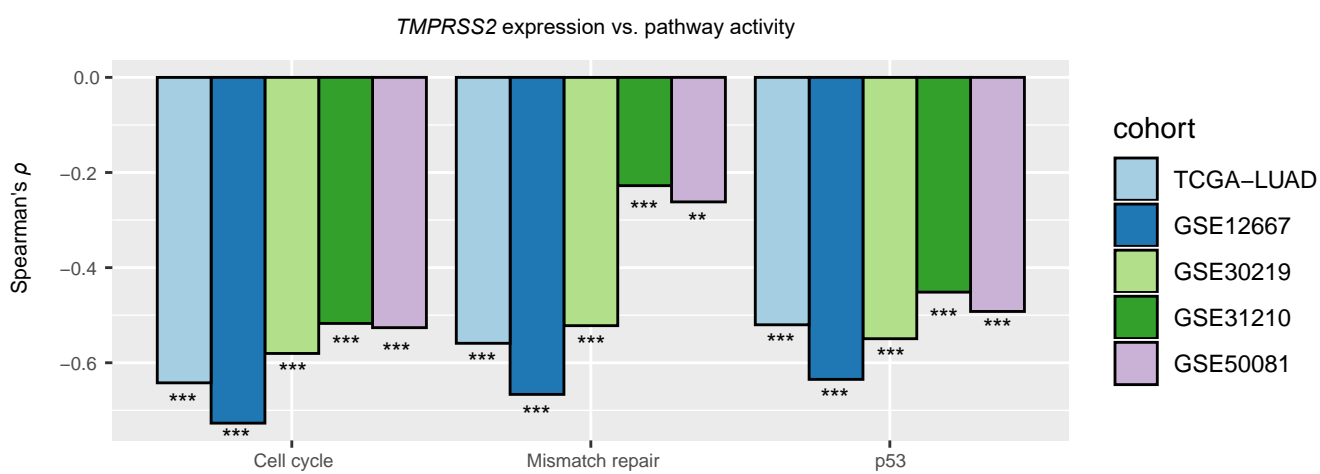

**B**

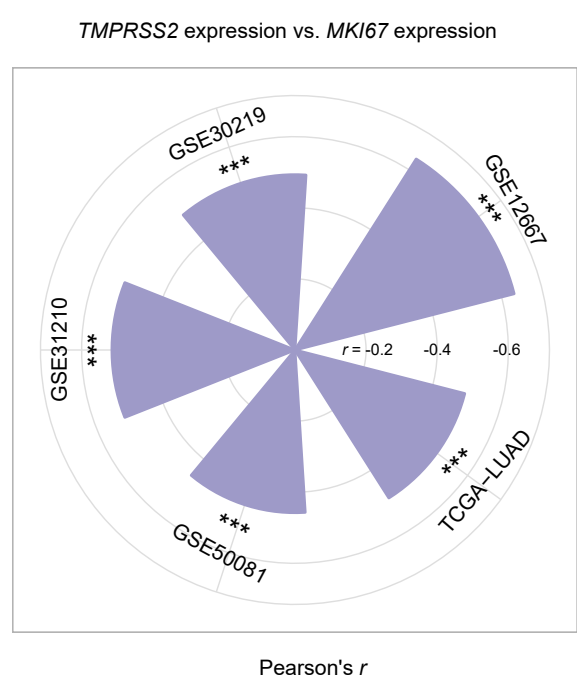

**C**

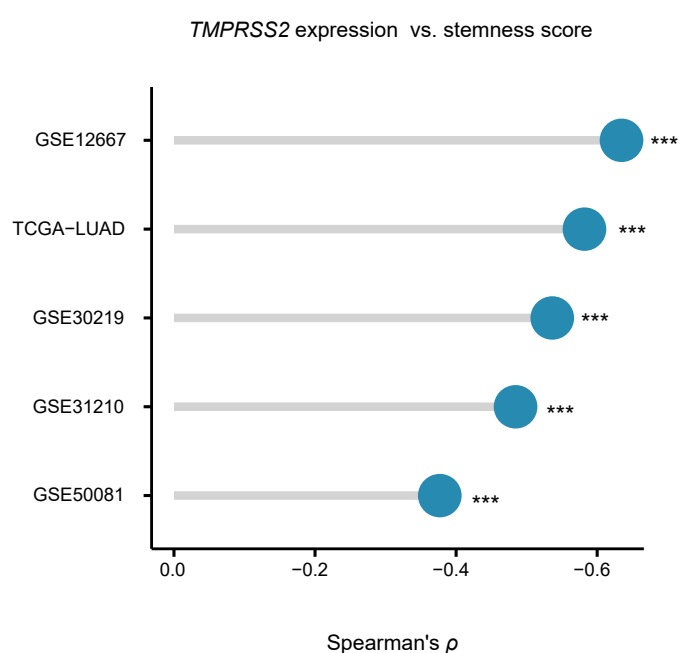

**D**

**TCGA-LUAD**

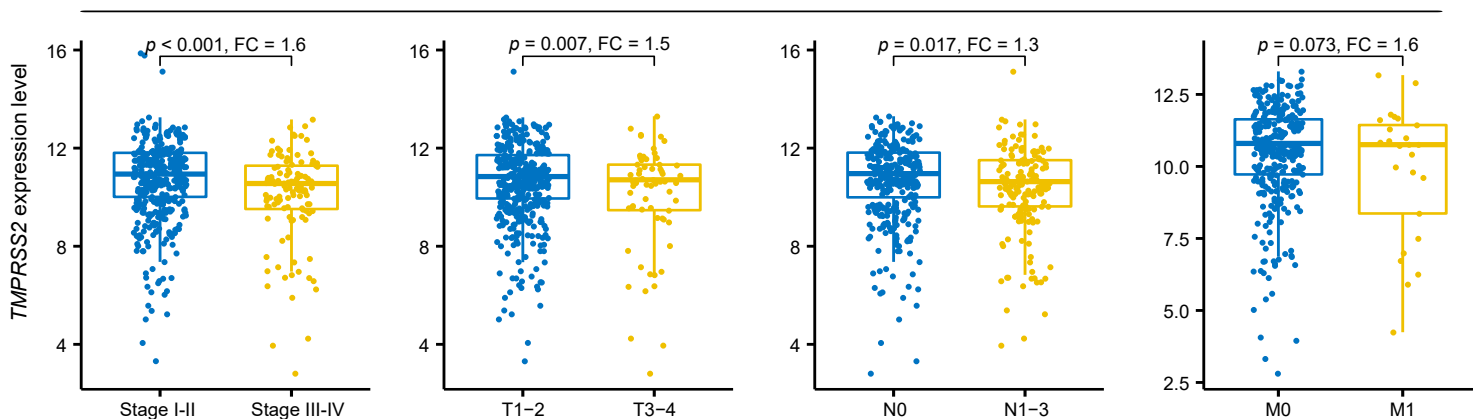

**GSE30219**

**GSE50081**

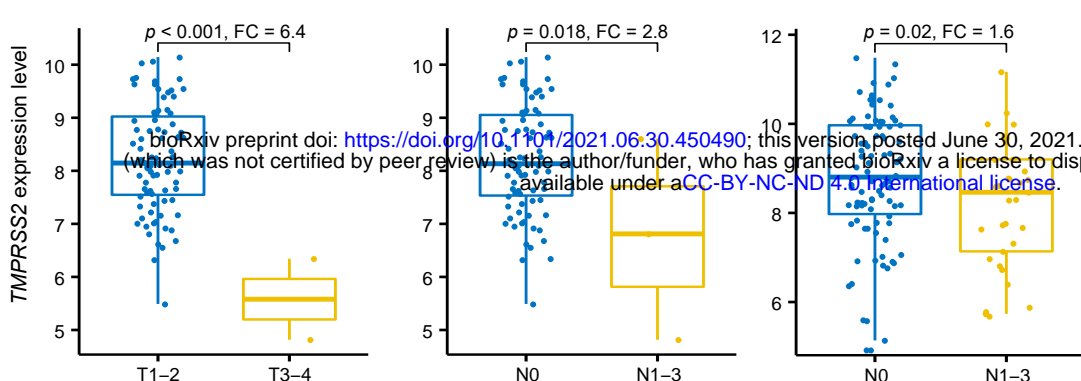

**E**

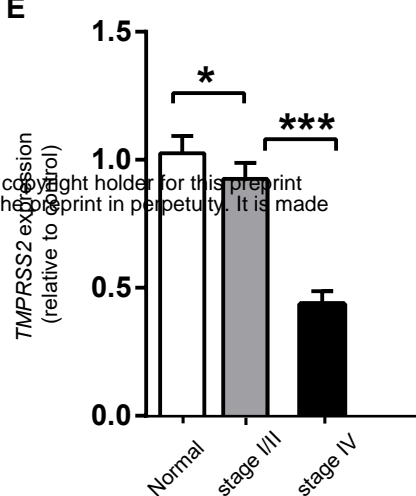

**F**

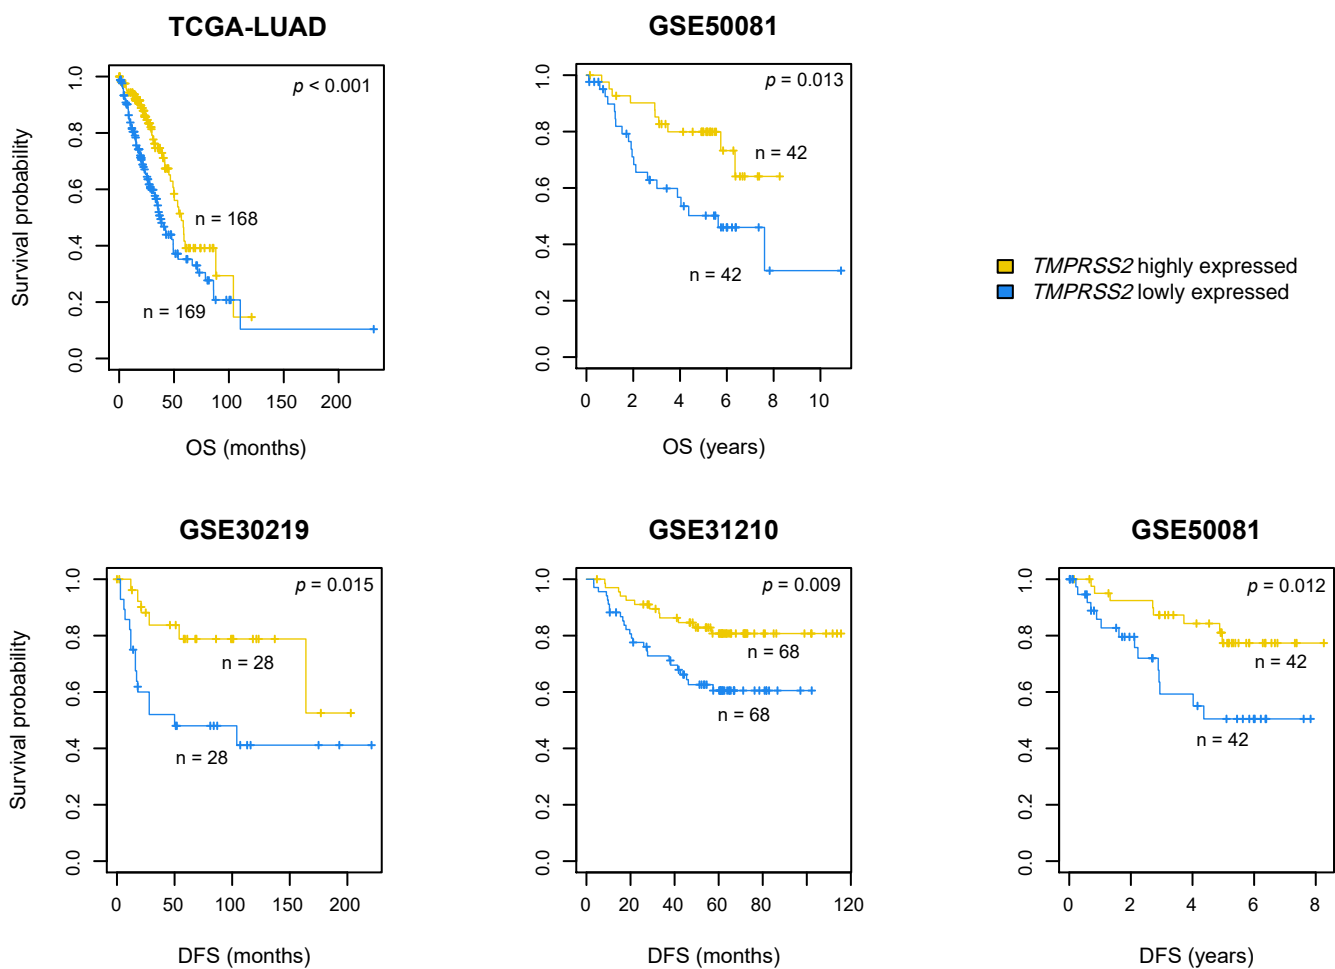

**G**

**TCGA-LUAD**

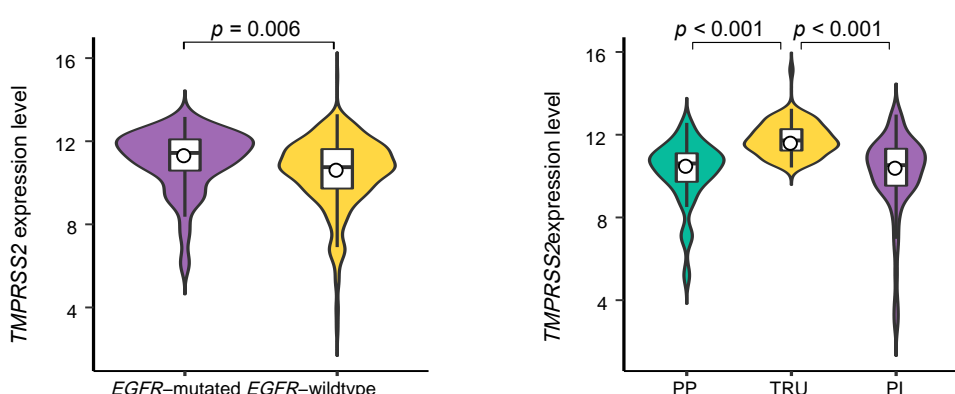

Figure 3

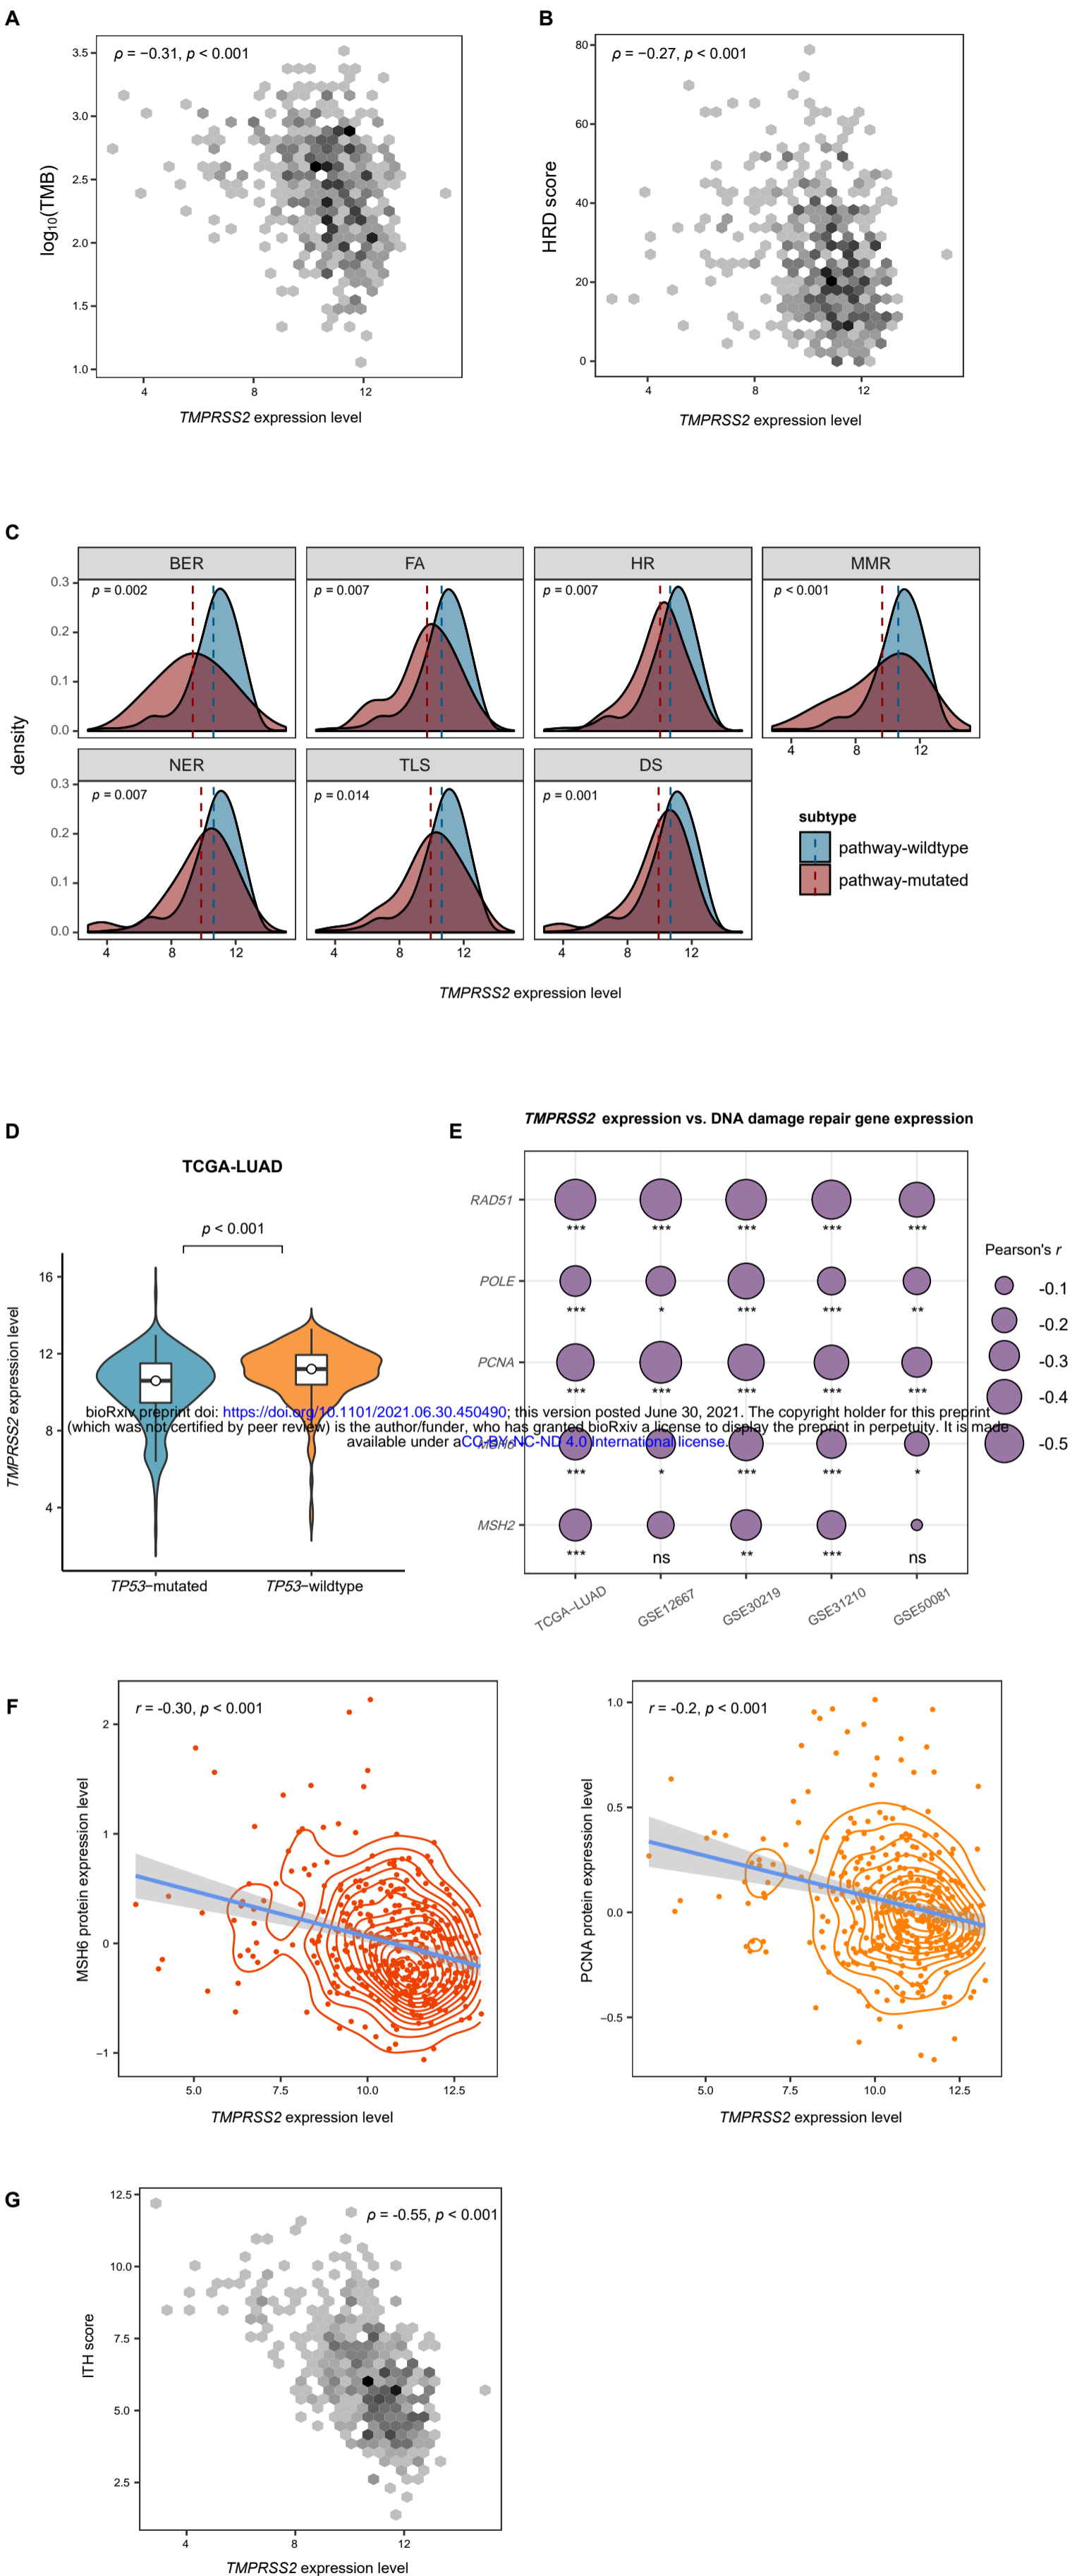



A

Positive expression correlation

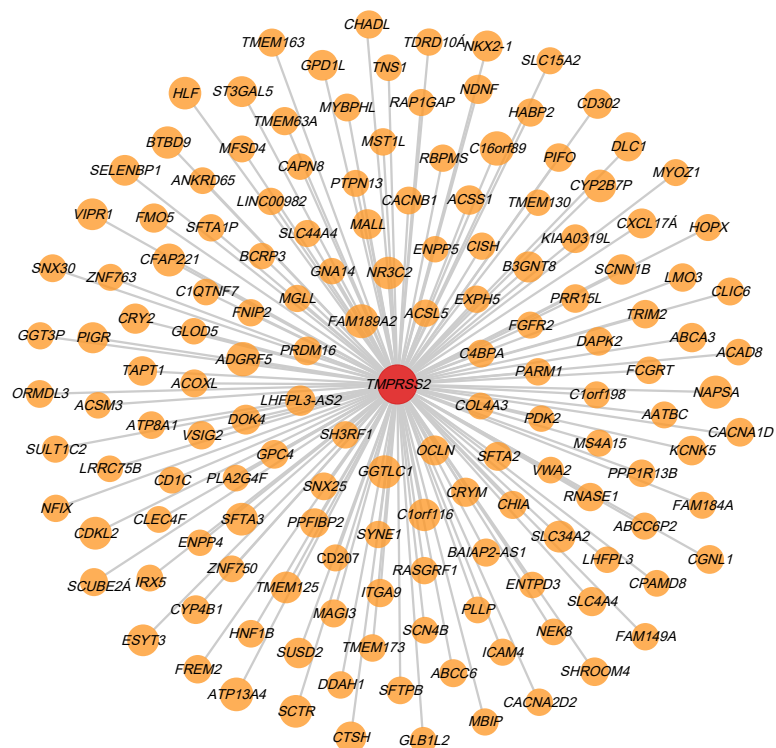

Negative expression correlation

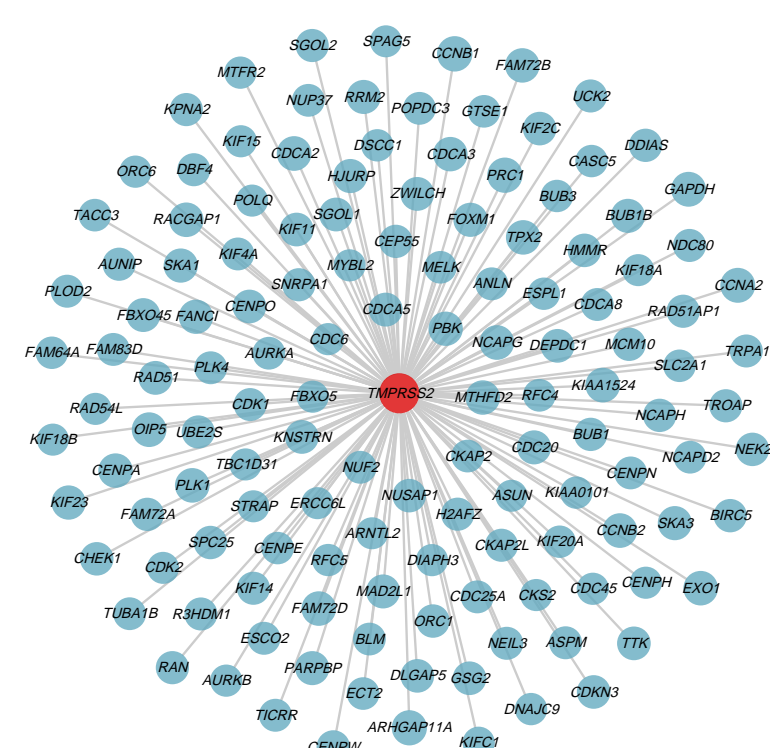

B

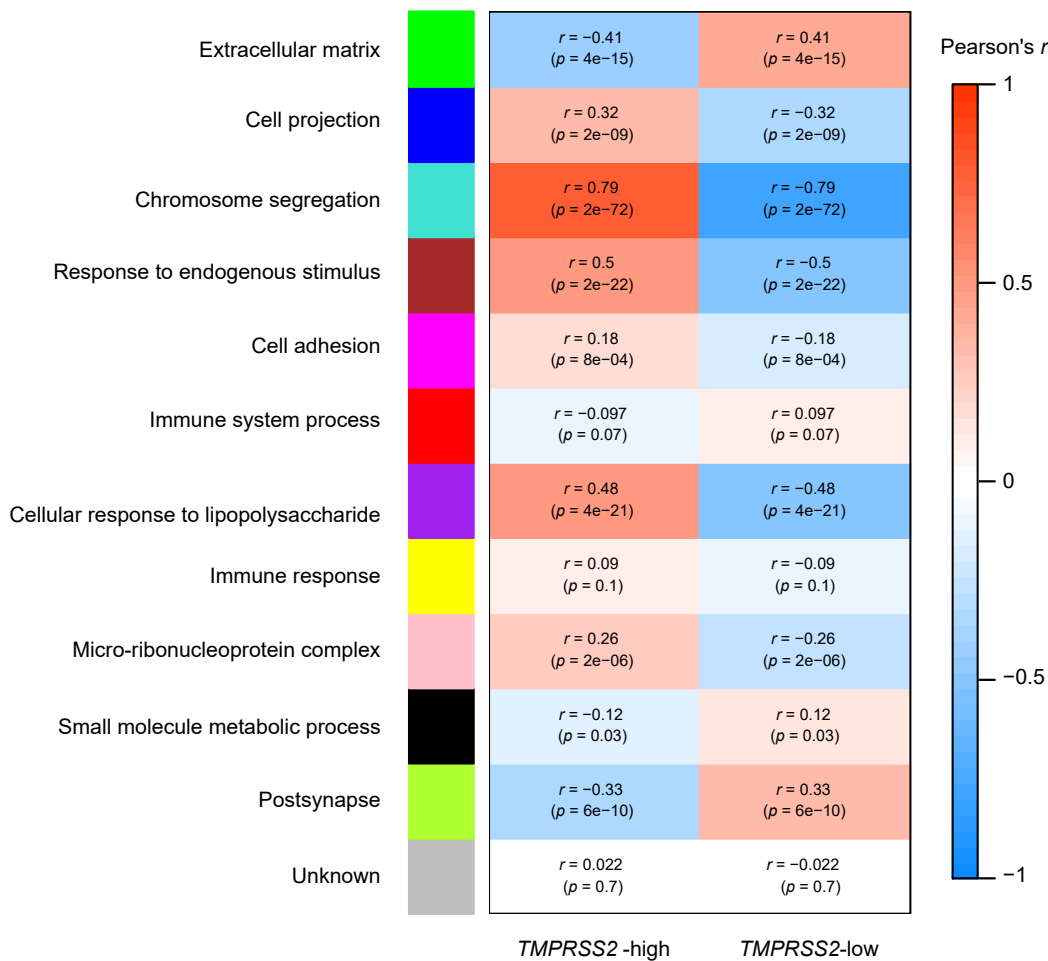

Figure 5

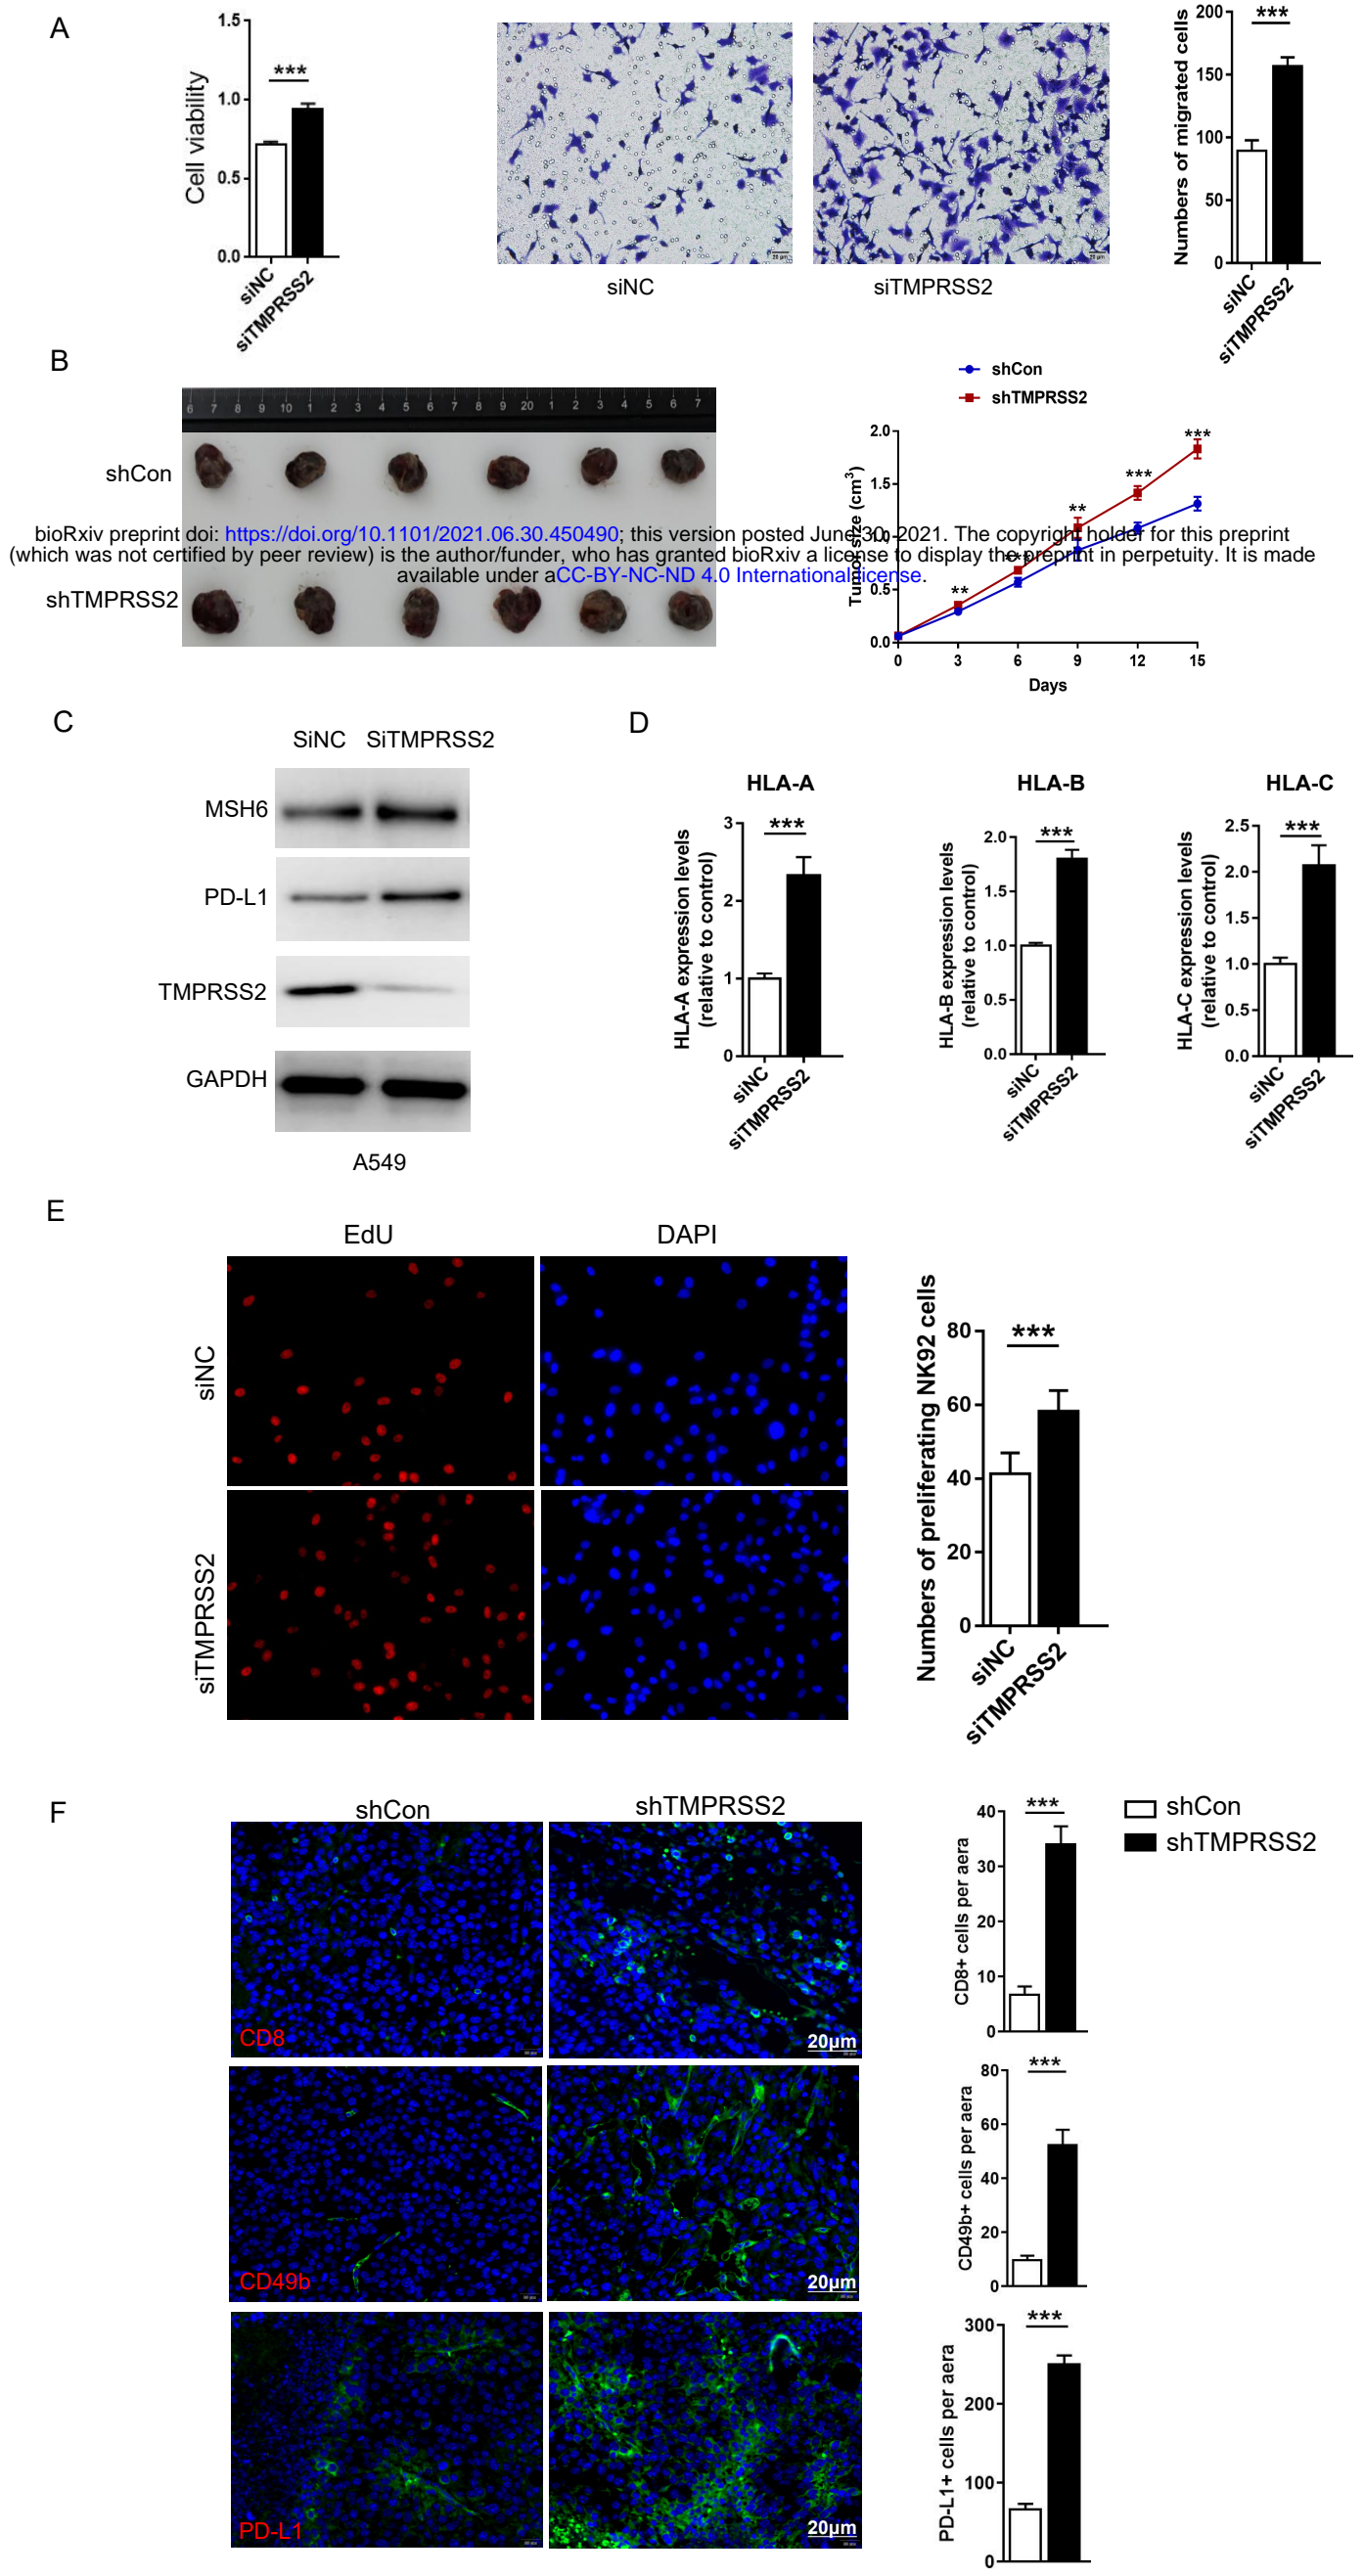

bioRxiv preprint doi: <https://doi.org/10.1101/2021.06.30.450490>; this version posted June 30, 2021. The copyright holder for this preprint (which was not certified by peer review) is the author/funder, who has granted bioRxiv a license to display the preprint in perpetuity. It is made available under aCC-BY-NC-ND 4.0 International license.

Figure 5

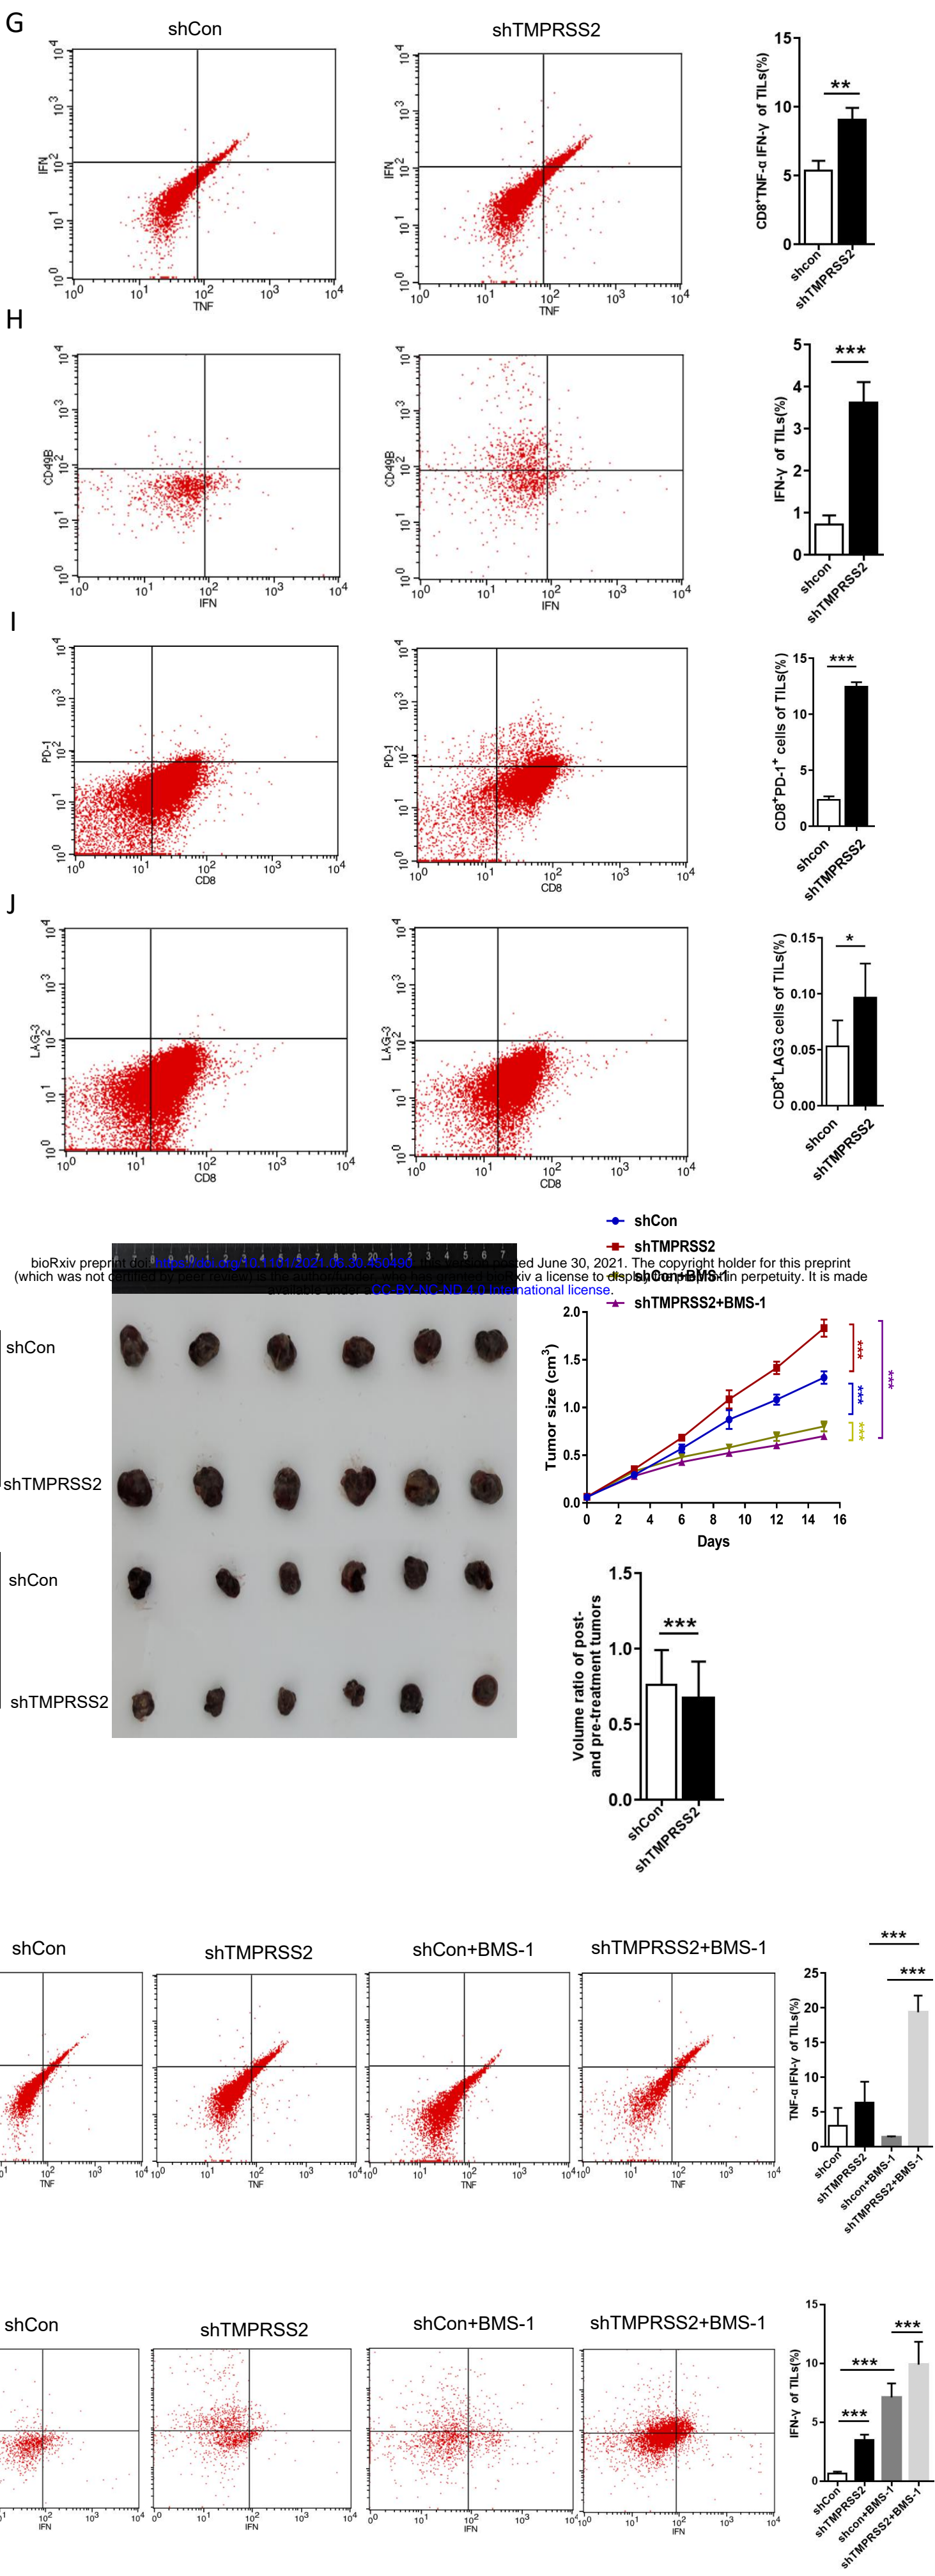

A

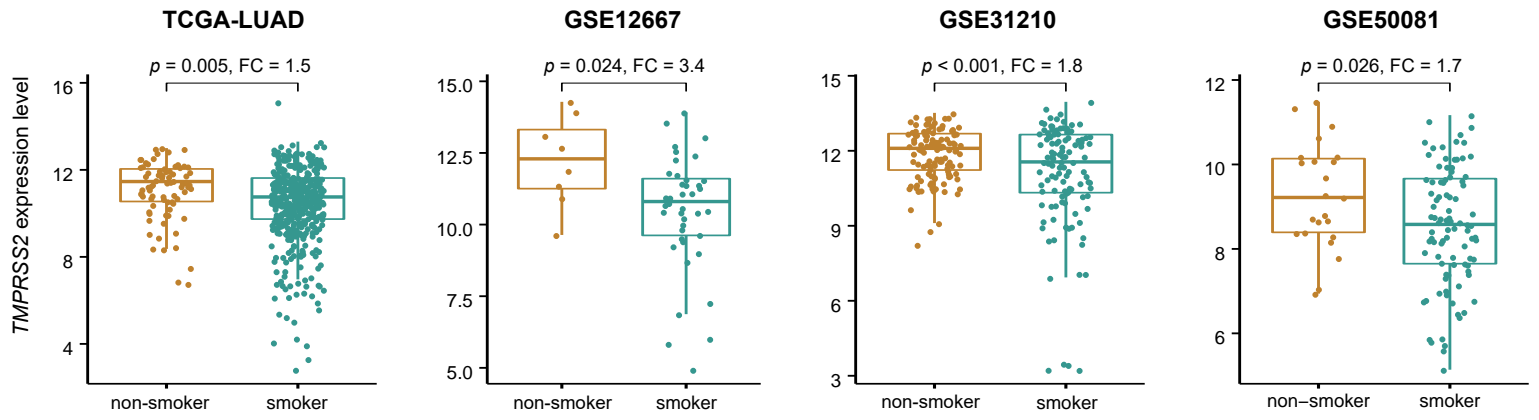

B

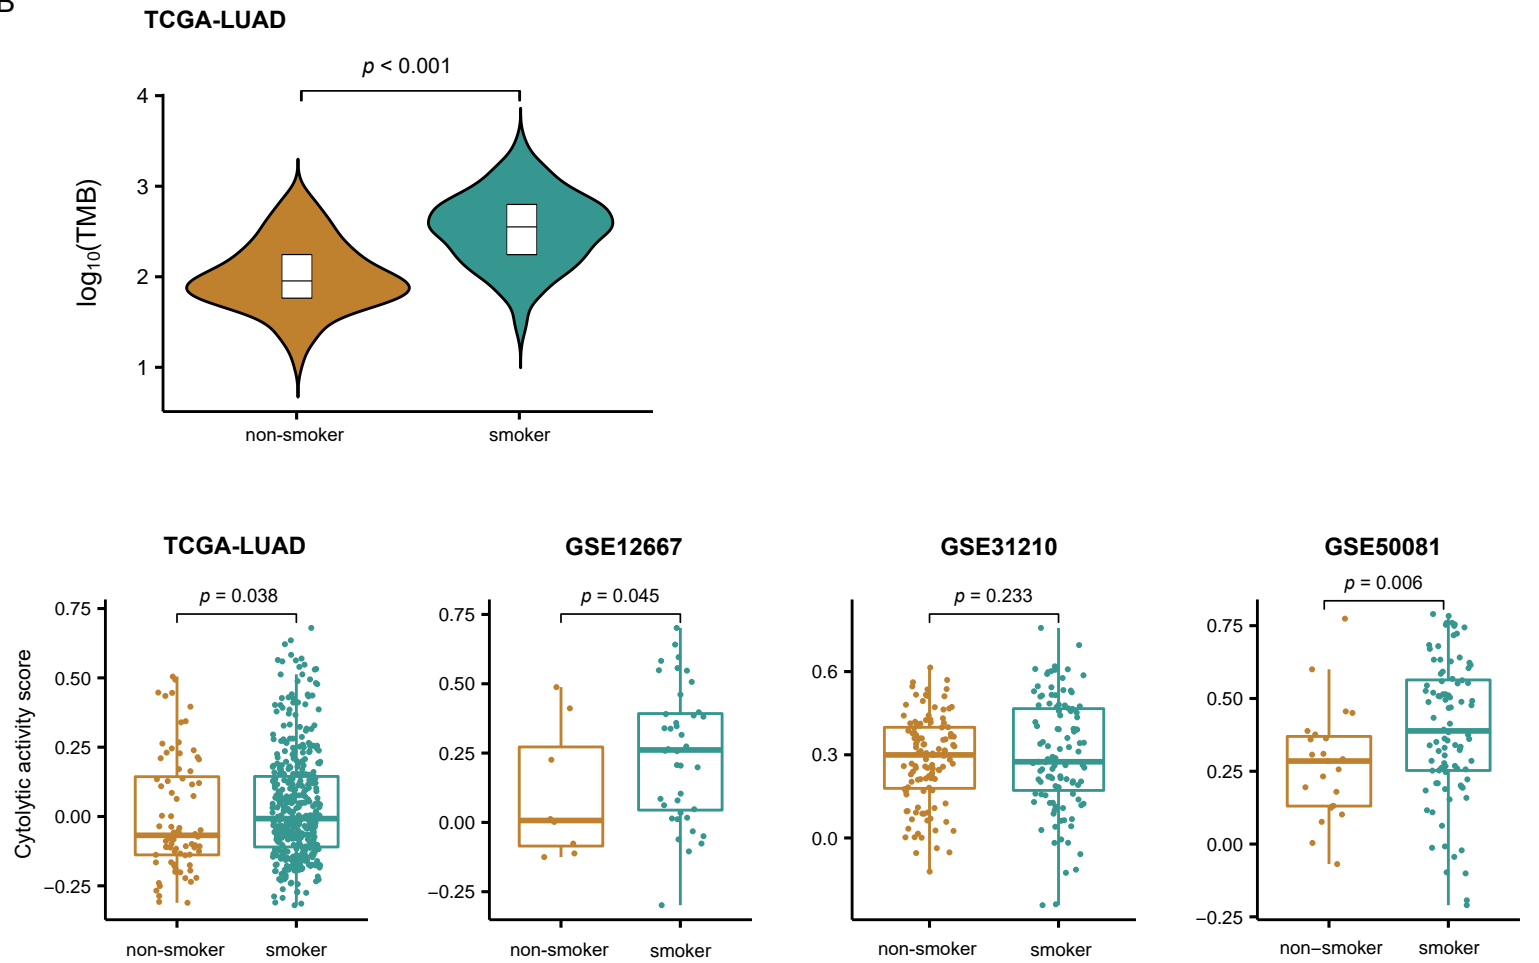

Source: https://www.biorxiv.org/content/10.1101/2021.06.30.450490v1.full.pdf
